# Supplementary material for: Control of type III protein secretion using a minimal genetic system
Source: PubMed Central journal article supplement (PMC5436071; doi:10.1038/ncomms14737), 2017-05-09
Supplement: ncomms14737-s1.pdf [file ncomms14737-s1.pdf]

### Refactored *prg-org* operon

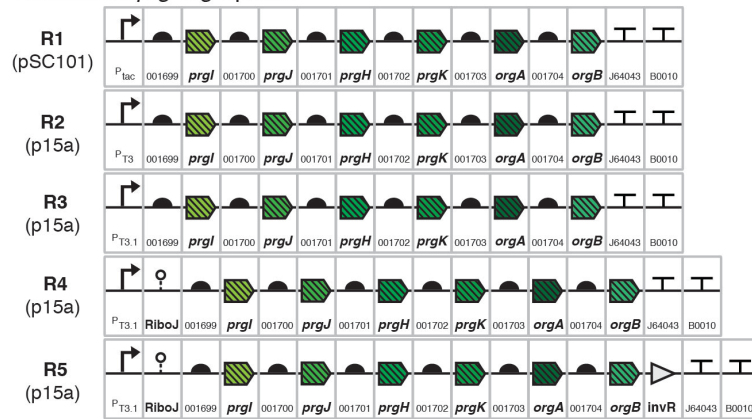

### Refactored *inv-spa* operon

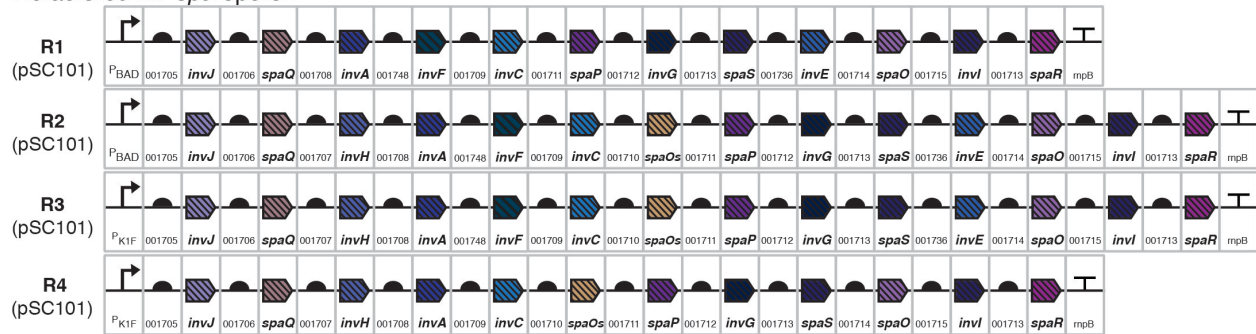

**Supplementary Figure 1: Variants of the refactored operons shown in Supplementary Table 1.** The maps of the plasmid backbones are shown in Supplementary Figure 18. Part sequences are provided in Supplementary Table 6. The final refactored operon was built by iterating over multiple steps. First, the individual operons were constructed and tested under inducible control in knockout strains where only that operon had been deleted from SPI-1. Next, the operons were combined and tested with the controller in a strain that contained both operons deleted, but the remainder of SPI-1 intact. Finally, the complete system was constructed and tested in a full knockout strain. During the second and third stages of this process, additional improvements were made to the original refactored operons. Flagella knockouts were made for structural analysis. Supplementary Table 2 and Supplementary Figure 1 show the variations of the system and plasmid version and strain genotype used for the experiments presented in the main text and SI figures.

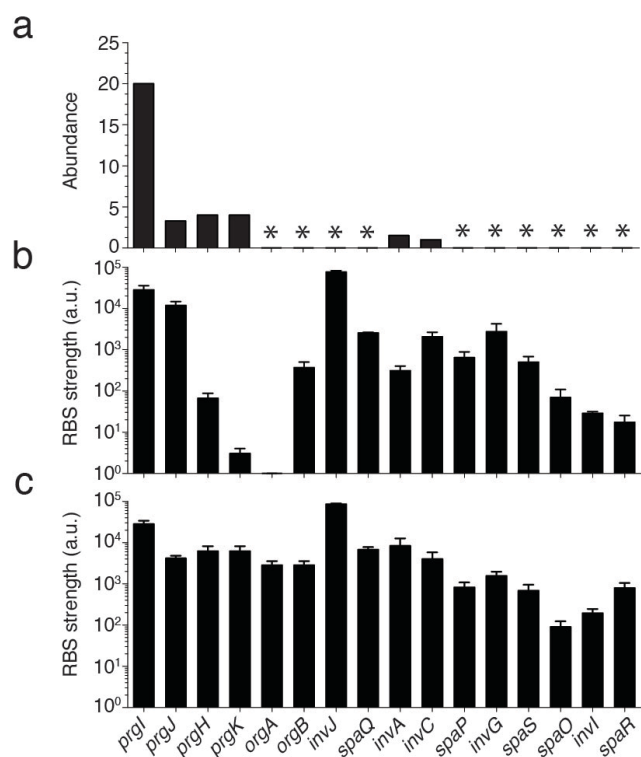

**Supplementary Figure 2: Data used to select synthetic RBSs in the construction of the first refactored operons.** (a) The molar ratios from previously published T3SS needle structures<sup>1,2</sup>. The *invC* gene was arbitrarily set to 1 and the abundances of other genes are relative to this value. Genes for which there was no information are marked with a star. (b) The strength of RBS genes measured for the native SPI-1 RBSs of each gene (Methods). The reporter system and measurements are described in the text and Methods. (c) The strength of the synthetic RBSs selected for each gene. The sequences are provided in Supplementary Table 6. The error bars represent the standard deviation of at least four replicates performed on different days.

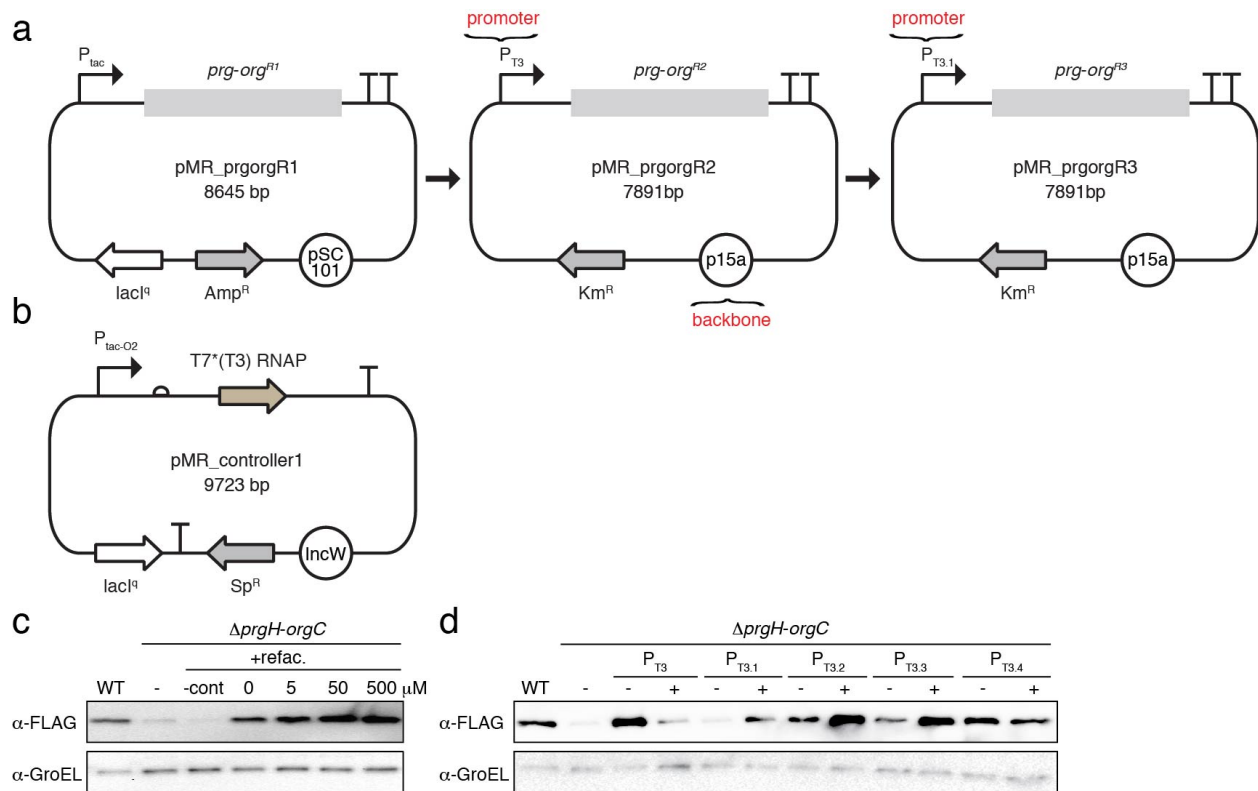

**Supplementary Figure 3: Tuning of expression level of refactored *prg-org* operon.** (a) Plasmids maps are shown for the refactored *prg-org* operons. The maps correspond to Supplementary Table 2 and Supplementary Figure 1. (b) The map of the controller plasmid for refactored *prg-org* operon is shown. T7\*(T3) RNAP is under the control of P<sub>lac-O2</sub> promoter, which consists of 2 operator sites for lacI<sup>q</sup> (Supplementary Figure 17a). (c) Secretion assay of the refactored operon in  $\Delta prgH-orgC$  (MR01) containing pMR\_prgorgR2 (*prg-org*<sup>R2</sup>) and pMR\_controller1. Titration of inducer (IPTG; 0, 5, 50, 500  $\mu$ M) was compared with the secretion from the  $\Delta prgH-orgC$  strain containing only pMR\_prgorgR2 (-cont). (d) A secretion assay is shown with *prg-org*<sup>R2</sup> under the control of T3 promoters of increasing strength (left to right; <sup>3</sup>). Secretion was assayed in the  $\Delta prgH-orgC$  strain (MR01). To test for inducibility, secretion was tested without (-) or with (+) 50  $\mu$ M IPTG.

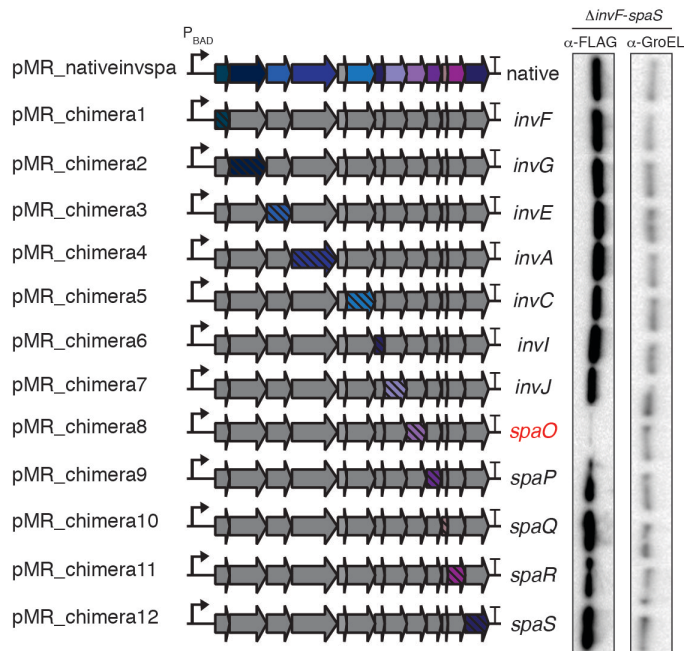

**Supplementary Figure 4: Library of chimeric native/refactored *inv-spa* operons.** Gibson assembly was used to swap the synthetic RBS and gene into each position of the native operon on the pMR\_nativeinvspa plasmid. Secretion assays are shown when the operon is induced by 0.1 mM arabinose.



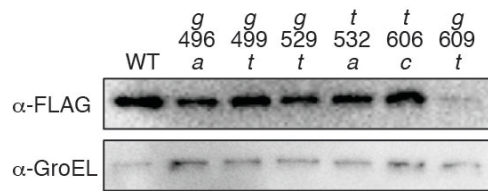

**Supplementary Figure 5: Secretion assay for the *spaO* mutants in the context of the native *inv-spa* operon under P<sub>BAD</sub> control.** Arabinose was added at a concentration of 0.1 mM.

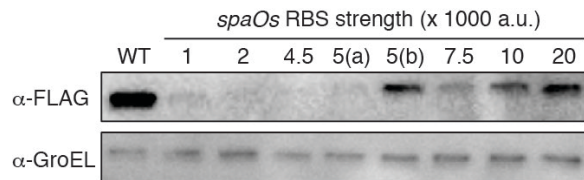

**Supplementary Figure 6: The impact of the *spaOs* RBS strength on secretion is shown.** The expression of refactored system was induced by 0.1 mM arabinose.

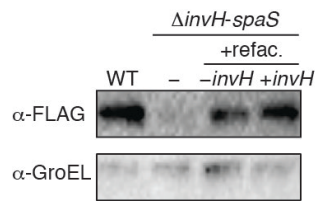

**Supplementary Figure 7: Incorporation of *invH* increases secretion efficiency.** Secretion efficiency was measured from the  $\Delta invH\text{-}spaS$  strain (MR03) containing *inv-spa* operon with refactored *invH* under the 5000 au RBS control (*inv-spa*<sup>R2</sup>). The expression of refactored operon was induced by 0.1 mM arabinose.

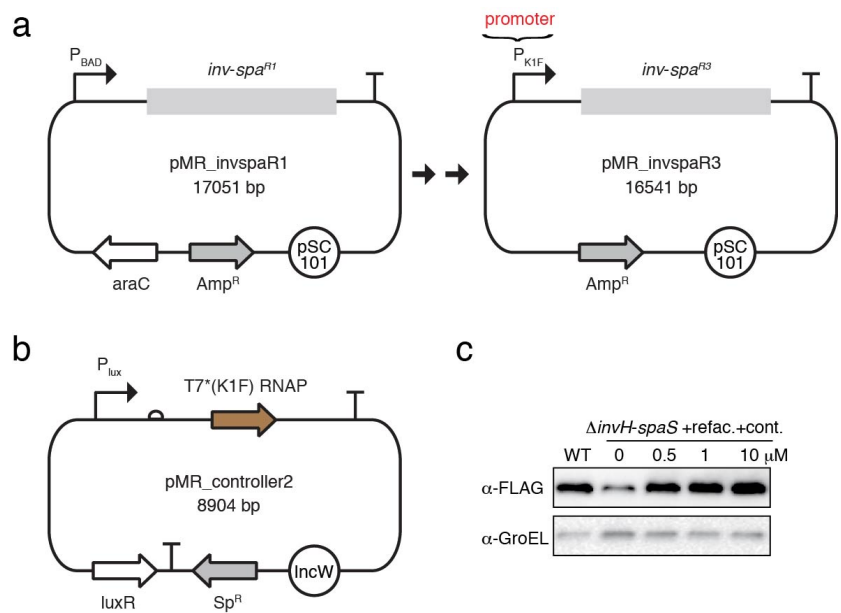

**Supplementary Figure 8: Refactored *inv-spa* operon under the control of the T7\*(K1F) RNAP.** (a) Plasmid maps of refactored *inv-spa* operon are shown. (b) The plasmid map of the controller with T7\*(K1F) RNAP is shown. (c) Secretion is analyzed from the  $\Delta invH-spaS$  strain (MR03) containing *inv-spa*<sup>R3</sup> and controller (pMR\_controller2). The concentrations correspond to the titration of the inducer.

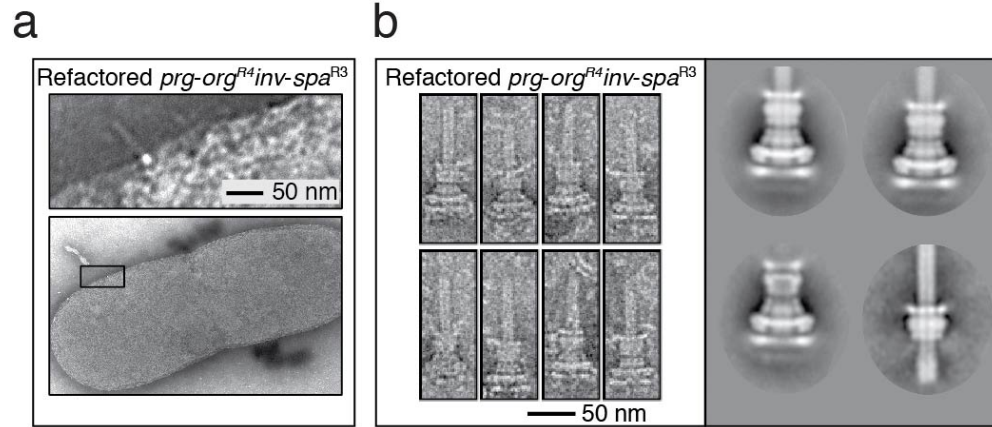

**Supplementary Figure 9: Structural analysis of the refactored *prg-org<sup>R4</sup>inv-spa<sup>R3</sup>* operons in the  $\Delta flhDC\Delta prgH\text{-}orgC\Delta invH\text{-}spaS$  knockout (MR24).** The refactored operons were induced with 10  $\mu\text{M}$  IPTG and 10  $\mu\text{M}$  AHL. **(a)** EM analysis of the bacterial surface after osmotic shock as described <sup>4</sup>. **(b)** At left panels (both top and bottom), isolated needle complexes are shown. Particles from isolated needle complex are classified at right panel.

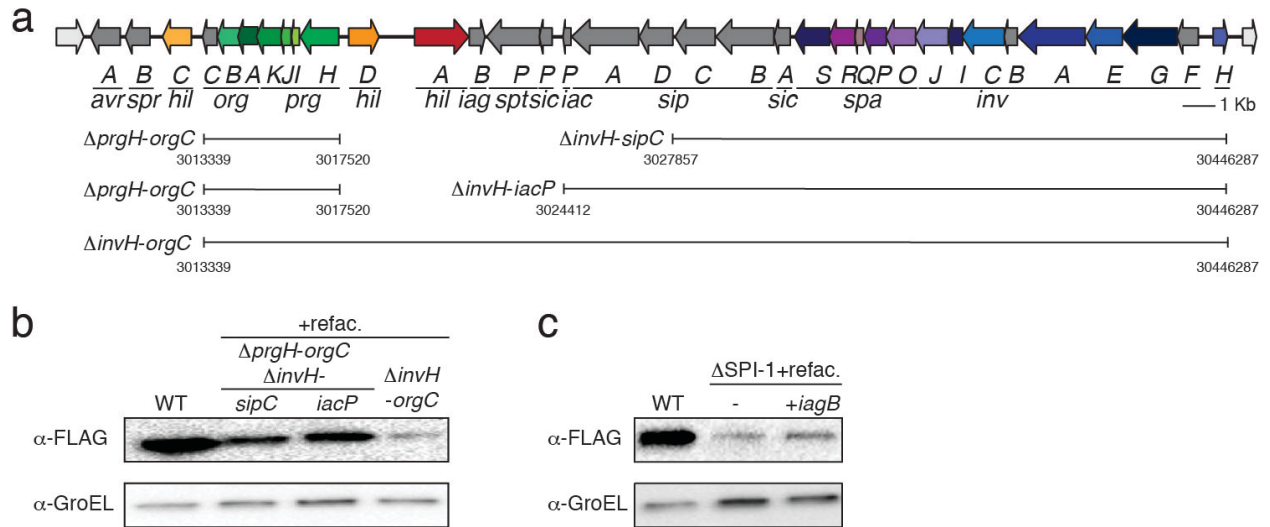

**Supplementary Figure 10: Genetic screening for identification of additional requirements encoded within SPI-1. (a)** A schematic is shown for additional deletions made to SPI-1. **(b)** A secretion assay was performed using the  $\Delta prgH-orgC \Delta invH-sipC$  or  $\Delta prgH-orgC \Delta invH-iacP$  or  $\Delta invH-orgC$  or strain containing the refactored system ( $prg-org^{R4} inv-spa^{R3}$ ). **(c)** The *iagB* gene (native sequence) was introduced at the 3'-end of refactored *prg-org* operon. Assay was performed for functionality of refactored system without (lane 2) or with *iagB* (lane3).

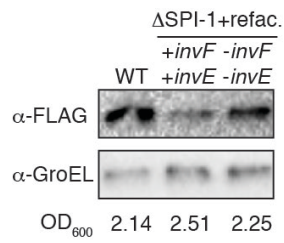

**Supplementary Figure 11: Secretion assay from refactored system in  $\Delta$ SPI-1.** The SPI-1 knock out strain was complemented with refactored system containing *invR* on refactored *prg-org* operon together with (*prg-org*<sup>R5</sup>*inv-spa*<sup>R3</sup>) or without *invF*/*invE* (*prg-org*<sup>R5</sup>*inv-spa*<sup>R4</sup>) on *inv-spa* operon. The refactored operons were induced with 10  $\mu$ M IPTG and 10  $\mu$ M AHL.

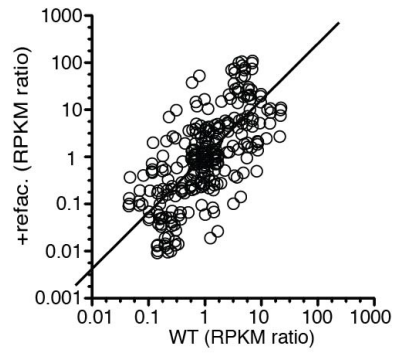

**Supplementary Figure 12: Regression of gene expression in the refactored system.** Median normalized RPKM values of the genes from wild type or the refactored SPI-1, fit to an  $x = y$  line ( $R^2 = 0.47$ ). Data point corresponds to the expression ratios between all pairs of genes in the cluster; *prgI*, *prgJ*, *prgH*, *prgK*, *orgA*, *orgB*, *invR*, *invJ*, *spaQ*, *invH*, *invA*, *invC*, *spaP*, *invG*, *spaS*, *spaO*, *invI* and *spaR*. The average relative standard deviation (RSD) for the genes between biological replicates is 24 % (wild type) and 8 % (the refactored SPI-1).

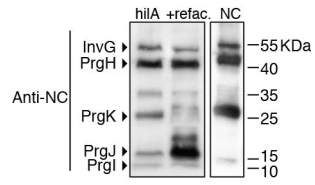

**Supplementary Figure 13: Expression level of needle complex proteins in strain SB905 (WT cluster, *hiA* overexpressed) or the refactored system.** Needle complex components were analyzed by western blot analysis as a function of time. Each strain was induced by adding 0.012 % arabinose (w/v) or 10  $\mu$ M IPTG/10  $\mu$ M AHL, for SB905 or the refactored SPI-1, respectively when the media was changed from L-broth to inducing media (IM; LB containing 0.3 M NaCl (Methods). The needle complex was purified from strain SB905 at 6 hrs (NC) and used as a control.



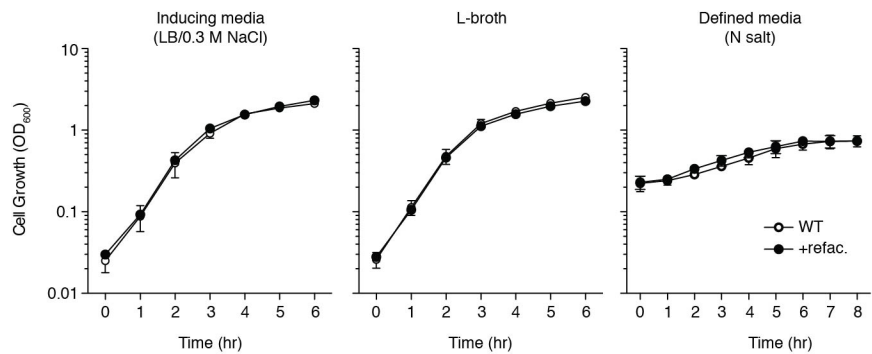

**Supplementary Figure 14: Growth curves of strains containing refactored SPI-1 grown in different medias.** The bacterial growth was measured from the strain expressing wild type or the refactored T3SS in inducing media (IM) or rich media without high osmolarity (L-broth) or defined media (N salt) (Figure 4a). The medias and growth experiments are described in the Methods. At each time point, samples were taken for measurement of optical density. For the refactored system, both inducers, IPTG and AHL, were added into each media as 10  $\mu$ M, respectively.

**a**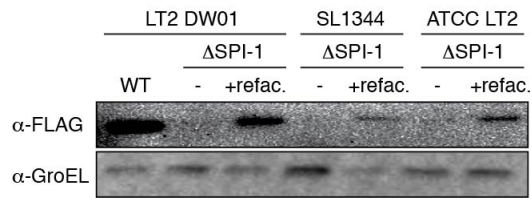**b**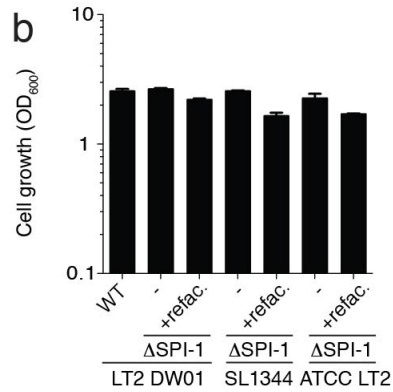

**Supplementary Figure 15: Secretion assay using the refactored T3SS in different Salmonella strains.** (a) Secretion assays are shown for the  $\Delta$ SPI-1 mutants containing the refactored system (*prg-org*<sup>RS</sup>*inv-spa*<sup>4</sup>, *pMR\_controller3*) with 10  $\mu$ M AHL and 10  $\mu$ M IPTG. The secretion assays were performed in L broth. The overnight cultures were freshly cultured in L-broth for 2 hrs at 250 rpm. The cultures were diluted 1:10 into 50 ml L-broth containing antibiotics and inducers if necessary and grown for 6 hrs. The secretion was compared to that from our wild type control (lane 1). (b) The cell density of each strain is shown at the same time that the secretion assay is performed.

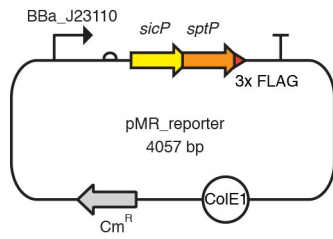

**Supplementary Figure 16: Reporter plasmid.** The SptP reporter is tagged with a 3x FLAG at C-terminus. The native *sicP-sptP* operon is preserved. The genes are expressed from the constitutive promoter, BBa\_J23110 and native RBS of *sicP* (62 bp upstream of the ATG).

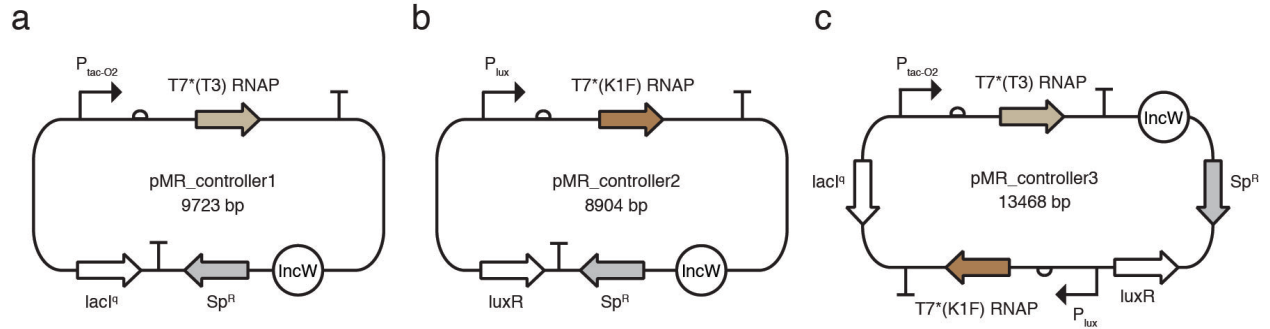

**Supplementary Figure 17: Controllers used in this study.** Two variants of T7 phage RNAP [T7\*(T3) and T7\*(K1F)] were used for controlling the refactored T3SS. The expression level of each RNAP was tuned by changing their RBS strength. This was done one at a time by designing a RBS library (AAGRAGSRGAAATGCWCS) for either T7\*(T3) or T7\*(K1F) and screening for those that produced >5-fold induction in *Salmonella* using mRFP and flow cytometry. **(a)** Map of T7\*(T3) RNAP based controller for refactored *prg-org* cluster. To decrease expression of T7\*(T3) under  $P_{tac}$  control, another *lacO* site was introduced ( $P_{tac-O2}$ ). **(b)** Map of T7\*(K1F) RNAP based controller for refactored *inv-spa* cluster. **(c)** Map of the unified controller with T7\*(T3) and T7\*(K1F).

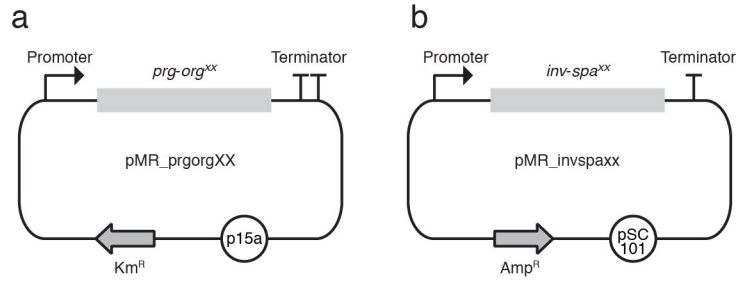

**Supplementary Figure 18: Two backbone plasmids used for the refactored operon variants in Supplementary Figure 1.** (a) Map of pMR\_prgorgxx backbone plasmid. XX indicate each version of refactored plasmid (R1 to R5). Promoter indicates  $P_{lac}$ ,  $P_{T3}$  and  $P_{T3.1}$  from each version. Terminator indicates part registry terminators in order: BBA\_J64043, BBA\_B0010. The pSC101 origin of replication was replaced with p15a in pSB4A3. (b) Map of pMR\_invspaxx backbone plasmid. XX indicate each version of refactored plasmid (R1 to R4). In each version,  $P_{BAD}$  or  $P_{K1F}$  was used as a promoter and *Salmonella mpB* terminator was used on pSB4A3 backbone.

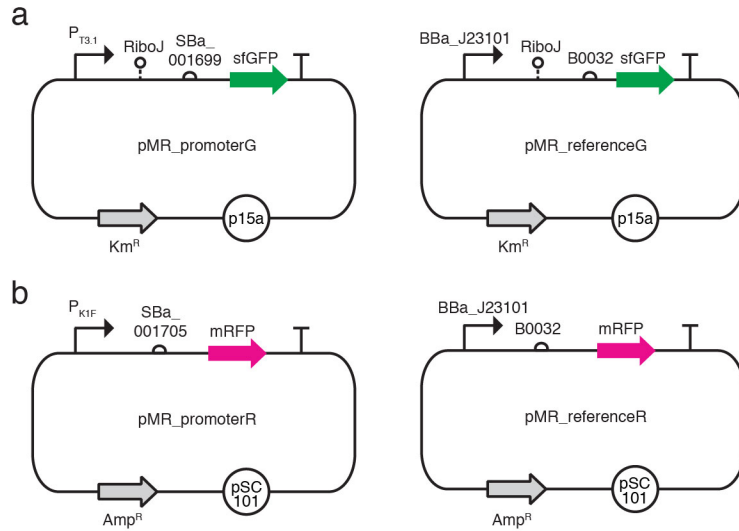

**Supplementary Figure 19: Reference standard for promoter activity normalization.** Construction of plasmids and measurements are described in Method. The fluorescent proteins, sfGFP or mRFP are under the control of constitutive promoter (BBa\_J23101) followed by a 5' UTR (BBa\_B0032) in each reference plasmid. **(a)** Map of pMR\_promoterG for measurement of T3.1 promoter strength (left) and pMR\_referenceG as a reference (right). **(b)** Map of pMR\_promoterR for measurement of K1F promoter strength (left) and pMR\_referenceR as a reference (right).

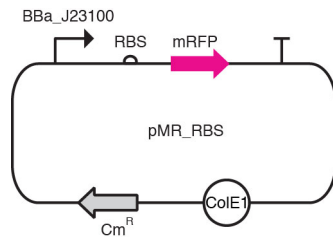

**Supplementary Figure 20: Plasmid map of the backbone used to generate the *Salmonella* RBS library.** Part registry RBSs (BBa\_B0030, BBa\_J61101, BBa\_J61130) were introduced on ColE1 backbone plasmid, respectively. RBS library was built as described in Method. For measurement of RBS strength, mRFP was placed under the control of constitutive promoter, BBa\_J23100.

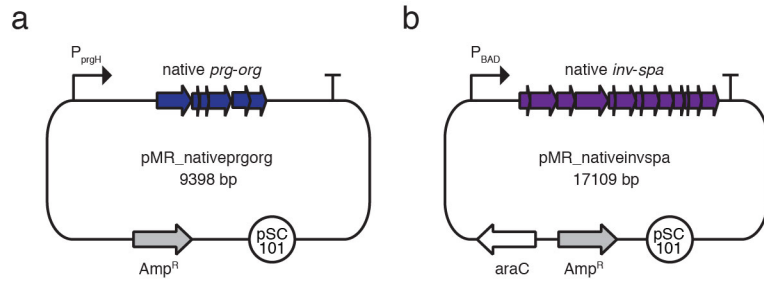

**Supplementary Figure 21:** Plasmids used to test the complementation of the native *prg-org* (a) and *inv-spa* (b) operons on a plasmid backbone. The native *prgH* promoter was cloned but the native *inv-spa* promoter could not be cloned into the backbone. Because of this, the  $P_{BAD}$  inducible promoter was used to induce the *inv-spa* operon. The genomic region from 3,013,185 to 3,017,809 was cloned for native *prg-org* and from 3,031,533 to 3,044,066 for native *inv-spa* (genomic region based on LT2: NC\_003197.1).

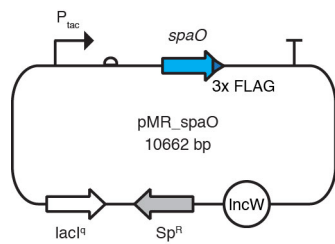

**Supplementary Figure 22:**

**Plasmid map of 3x Flag-tagged native or synthetic *spaO* gene (Figure 2i).**



Figure 2a, 2d

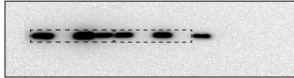

Figure 2f

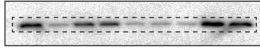

Figure 2c

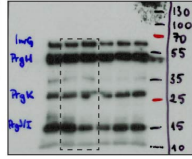

Figure 2e

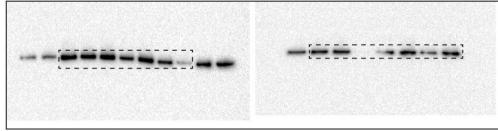

Figure 2h

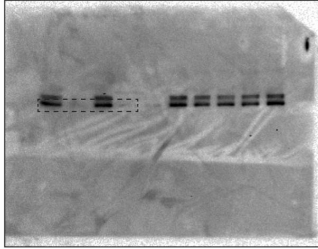

Figure 2i

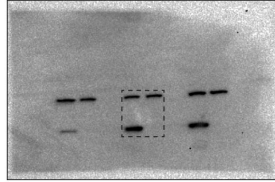

Figure 2j

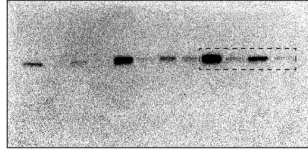

Figure 3b,  $\alpha$ -FLAG

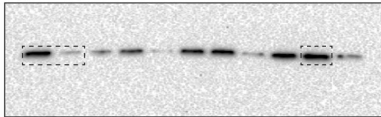

Figure 3b,  $\alpha$ -GroEL

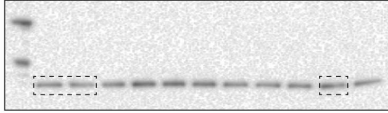

Figure 3c,  $\alpha$ -FLAG

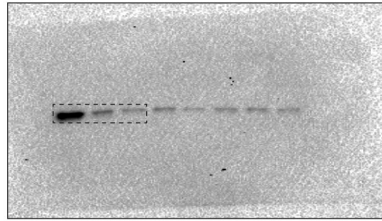

Figure 3c,  $\alpha$ -GroEL

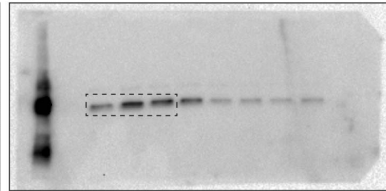

Figure 3e,  $\alpha$ -FLAG

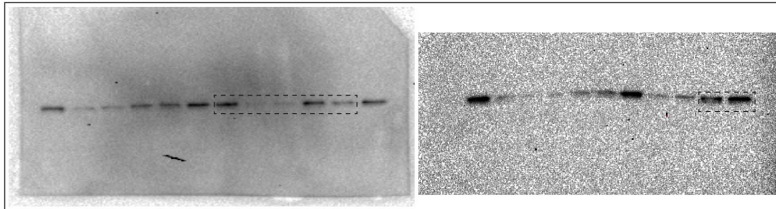

Figure 3e,  $\alpha$ -GroEL

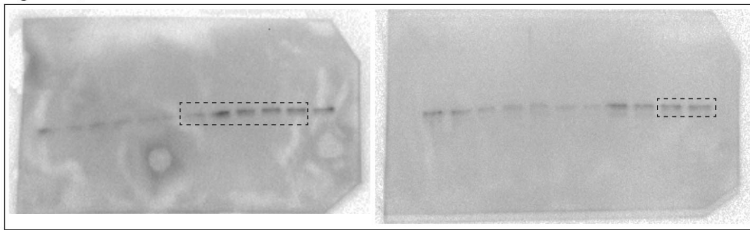

Figure 4a,  $\alpha$ -FLAG

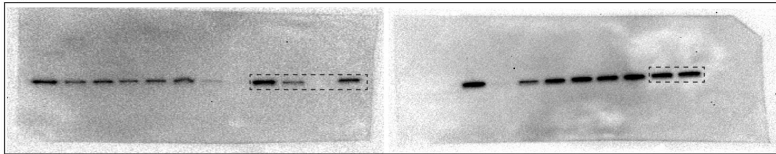

Figure 4a,  $\alpha$ -GroEL

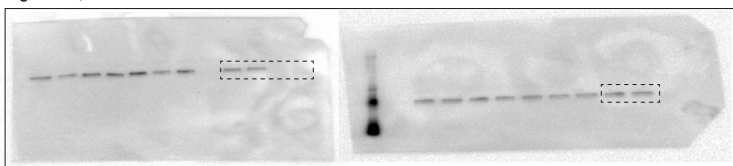

**Supplementary Figure 23:**

Full images of western blot figures shown in the main paper.



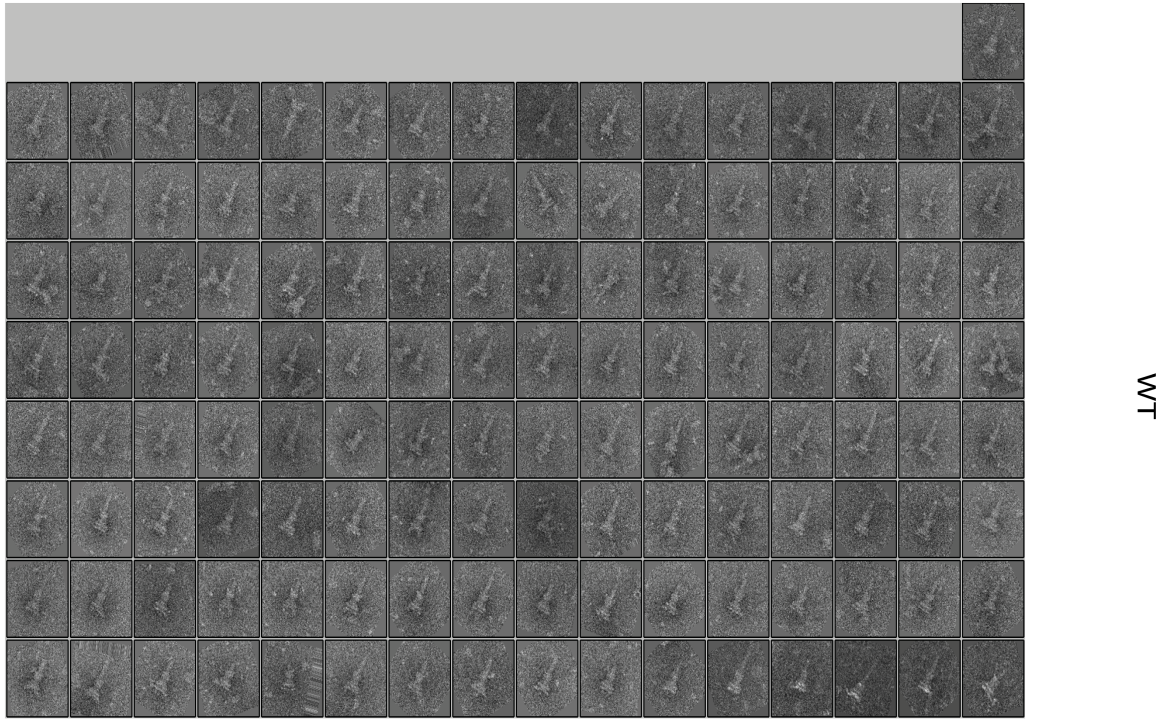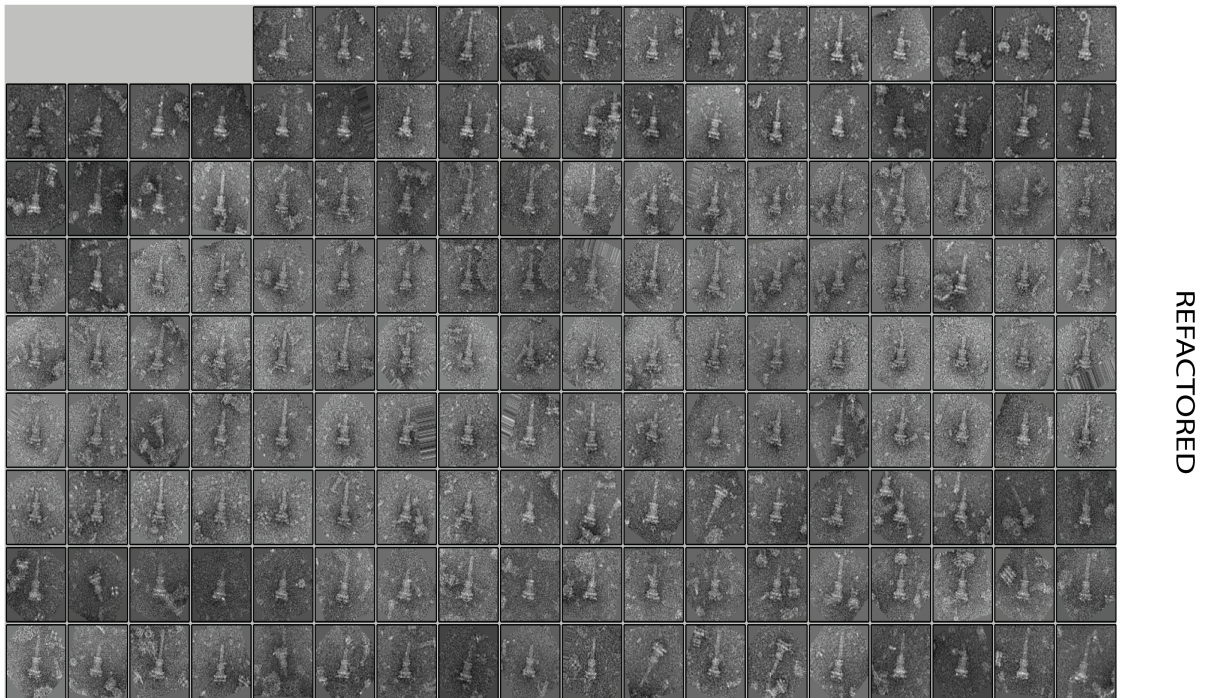

**Supplementary Figure 24:**  
(WT) and 4c (Refactored).

The images of individual particles used for 2D-classification shown in Figure 4b

**Supplementary Table 1: Genotype of Strain DW01**

| Gene                     | Genetic location <sup>a,b</sup>                                                                                                                                                                                                                                                                                                                                                                                                                                                                                                                                                                                                                                                                                                                                                                                                                                                                                                                                                                                                                                                                                                                                                                                                                                                                                                                                                                                                                                                                                                                                                                                                                                                                                                                                                                                                                                                                                                                                                                                                                                                                                                                                                                                                                                                                                                                                                                                                                                                                                                                                                                                                                                                                                                                                                                                                                                                                                                                                                                                                                                                                                                                                                                                                                                                                                                                                             |
|--------------------------|-----------------------------------------------------------------------------------------------------------------------------------------------------------------------------------------------------------------------------------------------------------------------------------------------------------------------------------------------------------------------------------------------------------------------------------------------------------------------------------------------------------------------------------------------------------------------------------------------------------------------------------------------------------------------------------------------------------------------------------------------------------------------------------------------------------------------------------------------------------------------------------------------------------------------------------------------------------------------------------------------------------------------------------------------------------------------------------------------------------------------------------------------------------------------------------------------------------------------------------------------------------------------------------------------------------------------------------------------------------------------------------------------------------------------------------------------------------------------------------------------------------------------------------------------------------------------------------------------------------------------------------------------------------------------------------------------------------------------------------------------------------------------------------------------------------------------------------------------------------------------------------------------------------------------------------------------------------------------------------------------------------------------------------------------------------------------------------------------------------------------------------------------------------------------------------------------------------------------------------------------------------------------------------------------------------------------------------------------------------------------------------------------------------------------------------------------------------------------------------------------------------------------------------------------------------------------------------------------------------------------------------------------------------------------------------------------------------------------------------------------------------------------------------------------------------------------------------------------------------------------------------------------------------------------------------------------------------------------------------------------------------------------------------------------------------------------------------------------------------------------------------------------------------------------------------------------------------------------------------------------------------------------------------------------------------------------------------------------------------------------------|
| <i>aceF</i>              | 180033-180034 (CG to GC)                                                                                                                                                                                                                                                                                                                                                                                                                                                                                                                                                                                                                                                                                                                                                                                                                                                                                                                                                                                                                                                                                                                                                                                                                                                                                                                                                                                                                                                                                                                                                                                                                                                                                                                                                                                                                                                                                                                                                                                                                                                                                                                                                                                                                                                                                                                                                                                                                                                                                                                                                                                                                                                                                                                                                                                                                                                                                                                                                                                                                                                                                                                                                                                                                                                                                                                                                    |
| <i>yacH</i>              | 184304-184305 (CG to GC)                                                                                                                                                                                                                                                                                                                                                                                                                                                                                                                                                                                                                                                                                                                                                                                                                                                                                                                                                                                                                                                                                                                                                                                                                                                                                                                                                                                                                                                                                                                                                                                                                                                                                                                                                                                                                                                                                                                                                                                                                                                                                                                                                                                                                                                                                                                                                                                                                                                                                                                                                                                                                                                                                                                                                                                                                                                                                                                                                                                                                                                                                                                                                                                                                                                                                                                                                    |
| <i>rrsH</i>              | 290716-290717 (C to A)                                                                                                                                                                                                                                                                                                                                                                                                                                                                                                                                                                                                                                                                                                                                                                                                                                                                                                                                                                                                                                                                                                                                                                                                                                                                                                                                                                                                                                                                                                                                                                                                                                                                                                                                                                                                                                                                                                                                                                                                                                                                                                                                                                                                                                                                                                                                                                                                                                                                                                                                                                                                                                                                                                                                                                                                                                                                                                                                                                                                                                                                                                                                                                                                                                                                                                                                                      |
| <i>rrsI</i>              | 290716-290717 (C to A)                                                                                                                                                                                                                                                                                                                                                                                                                                                                                                                                                                                                                                                                                                                                                                                                                                                                                                                                                                                                                                                                                                                                                                                                                                                                                                                                                                                                                                                                                                                                                                                                                                                                                                                                                                                                                                                                                                                                                                                                                                                                                                                                                                                                                                                                                                                                                                                                                                                                                                                                                                                                                                                                                                                                                                                                                                                                                                                                                                                                                                                                                                                                                                                                                                                                                                                                                      |
| <i>bmQ</i>               | 453937-453938 (C to T)                                                                                                                                                                                                                                                                                                                                                                                                                                                                                                                                                                                                                                                                                                                                                                                                                                                                                                                                                                                                                                                                                                                                                                                                                                                                                                                                                                                                                                                                                                                                                                                                                                                                                                                                                                                                                                                                                                                                                                                                                                                                                                                                                                                                                                                                                                                                                                                                                                                                                                                                                                                                                                                                                                                                                                                                                                                                                                                                                                                                                                                                                                                                                                                                                                                                                                                                                      |
| <i>fimH</i>              | 608855-608856 (G to C)                                                                                                                                                                                                                                                                                                                                                                                                                                                                                                                                                                                                                                                                                                                                                                                                                                                                                                                                                                                                                                                                                                                                                                                                                                                                                                                                                                                                                                                                                                                                                                                                                                                                                                                                                                                                                                                                                                                                                                                                                                                                                                                                                                                                                                                                                                                                                                                                                                                                                                                                                                                                                                                                                                                                                                                                                                                                                                                                                                                                                                                                                                                                                                                                                                                                                                                                                      |
| <i>dcuC</i>              | 691690-691691 (C to T)                                                                                                                                                                                                                                                                                                                                                                                                                                                                                                                                                                                                                                                                                                                                                                                                                                                                                                                                                                                                                                                                                                                                                                                                                                                                                                                                                                                                                                                                                                                                                                                                                                                                                                                                                                                                                                                                                                                                                                                                                                                                                                                                                                                                                                                                                                                                                                                                                                                                                                                                                                                                                                                                                                                                                                                                                                                                                                                                                                                                                                                                                                                                                                                                                                                                                                                                                      |
| STM0399                  | 1016586-1016587 (CG to GC)                                                                                                                                                                                                                                                                                                                                                                                                                                                                                                                                                                                                                                                                                                                                                                                                                                                                                                                                                                                                                                                                                                                                                                                                                                                                                                                                                                                                                                                                                                                                                                                                                                                                                                                                                                                                                                                                                                                                                                                                                                                                                                                                                                                                                                                                                                                                                                                                                                                                                                                                                                                                                                                                                                                                                                                                                                                                                                                                                                                                                                                                                                                                                                                                                                                                                                                                                  |
| STM1043                  | 1129916-1129931 (D)                                                                                                                                                                                                                                                                                                                                                                                                                                                                                                                                                                                                                                                                                                                                                                                                                                                                                                                                                                                                                                                                                                                                                                                                                                                                                                                                                                                                                                                                                                                                                                                                                                                                                                                                                                                                                                                                                                                                                                                                                                                                                                                                                                                                                                                                                                                                                                                                                                                                                                                                                                                                                                                                                                                                                                                                                                                                                                                                                                                                                                                                                                                                                                                                                                                                                                                                                         |
| <i>yeaL</i>              | 1357015-1357016 (I: G)                                                                                                                                                                                                                                                                                                                                                                                                                                                                                                                                                                                                                                                                                                                                                                                                                                                                                                                                                                                                                                                                                                                                                                                                                                                                                                                                                                                                                                                                                                                                                                                                                                                                                                                                                                                                                                                                                                                                                                                                                                                                                                                                                                                                                                                                                                                                                                                                                                                                                                                                                                                                                                                                                                                                                                                                                                                                                                                                                                                                                                                                                                                                                                                                                                                                                                                                                      |
| <i>yeaG</i>              | 1363417-1363418 (I: C)                                                                                                                                                                                                                                                                                                                                                                                                                                                                                                                                                                                                                                                                                                                                                                                                                                                                                                                                                                                                                                                                                                                                                                                                                                                                                                                                                                                                                                                                                                                                                                                                                                                                                                                                                                                                                                                                                                                                                                                                                                                                                                                                                                                                                                                                                                                                                                                                                                                                                                                                                                                                                                                                                                                                                                                                                                                                                                                                                                                                                                                                                                                                                                                                                                                                                                                                                      |
| <i>mdtK</i>              | 1503291-1503292 (CG to GC)                                                                                                                                                                                                                                                                                                                                                                                                                                                                                                                                                                                                                                                                                                                                                                                                                                                                                                                                                                                                                                                                                                                                                                                                                                                                                                                                                                                                                                                                                                                                                                                                                                                                                                                                                                                                                                                                                                                                                                                                                                                                                                                                                                                                                                                                                                                                                                                                                                                                                                                                                                                                                                                                                                                                                                                                                                                                                                                                                                                                                                                                                                                                                                                                                                                                                                                                                  |
| <i>slyA</i>              | 1520175-1520176 (CG to GC)                                                                                                                                                                                                                                                                                                                                                                                                                                                                                                                                                                                                                                                                                                                                                                                                                                                                                                                                                                                                                                                                                                                                                                                                                                                                                                                                                                                                                                                                                                                                                                                                                                                                                                                                                                                                                                                                                                                                                                                                                                                                                                                                                                                                                                                                                                                                                                                                                                                                                                                                                                                                                                                                                                                                                                                                                                                                                                                                                                                                                                                                                                                                                                                                                                                                                                                                                  |
| <i>ydjJ</i>              | 1536626-1536627 (CG to GC)                                                                                                                                                                                                                                                                                                                                                                                                                                                                                                                                                                                                                                                                                                                                                                                                                                                                                                                                                                                                                                                                                                                                                                                                                                                                                                                                                                                                                                                                                                                                                                                                                                                                                                                                                                                                                                                                                                                                                                                                                                                                                                                                                                                                                                                                                                                                                                                                                                                                                                                                                                                                                                                                                                                                                                                                                                                                                                                                                                                                                                                                                                                                                                                                                                                                                                                                                  |
| <i>fumA</i>              | 1543815-1543816 (I: C)                                                                                                                                                                                                                                                                                                                                                                                                                                                                                                                                                                                                                                                                                                                                                                                                                                                                                                                                                                                                                                                                                                                                                                                                                                                                                                                                                                                                                                                                                                                                                                                                                                                                                                                                                                                                                                                                                                                                                                                                                                                                                                                                                                                                                                                                                                                                                                                                                                                                                                                                                                                                                                                                                                                                                                                                                                                                                                                                                                                                                                                                                                                                                                                                                                                                                                                                                      |
| <i>trg</i>               | 1715972-1715973 (CG to GC)                                                                                                                                                                                                                                                                                                                                                                                                                                                                                                                                                                                                                                                                                                                                                                                                                                                                                                                                                                                                                                                                                                                                                                                                                                                                                                                                                                                                                                                                                                                                                                                                                                                                                                                                                                                                                                                                                                                                                                                                                                                                                                                                                                                                                                                                                                                                                                                                                                                                                                                                                                                                                                                                                                                                                                                                                                                                                                                                                                                                                                                                                                                                                                                                                                                                                                                                                  |
| <i>mb</i>                | 1795045-1795046 (G to A)                                                                                                                                                                                                                                                                                                                                                                                                                                                                                                                                                                                                                                                                                                                                                                                                                                                                                                                                                                                                                                                                                                                                                                                                                                                                                                                                                                                                                                                                                                                                                                                                                                                                                                                                                                                                                                                                                                                                                                                                                                                                                                                                                                                                                                                                                                                                                                                                                                                                                                                                                                                                                                                                                                                                                                                                                                                                                                                                                                                                                                                                                                                                                                                                                                                                                                                                                    |
| <i>hnr</i>               | 1849647-1849648 (A to C)                                                                                                                                                                                                                                                                                                                                                                                                                                                                                                                                                                                                                                                                                                                                                                                                                                                                                                                                                                                                                                                                                                                                                                                                                                                                                                                                                                                                                                                                                                                                                                                                                                                                                                                                                                                                                                                                                                                                                                                                                                                                                                                                                                                                                                                                                                                                                                                                                                                                                                                                                                                                                                                                                                                                                                                                                                                                                                                                                                                                                                                                                                                                                                                                                                                                                                                                                    |
| <i>yoaE</i>              | 1926892-1926893 (I: GCG)                                                                                                                                                                                                                                                                                                                                                                                                                                                                                                                                                                                                                                                                                                                                                                                                                                                                                                                                                                                                                                                                                                                                                                                                                                                                                                                                                                                                                                                                                                                                                                                                                                                                                                                                                                                                                                                                                                                                                                                                                                                                                                                                                                                                                                                                                                                                                                                                                                                                                                                                                                                                                                                                                                                                                                                                                                                                                                                                                                                                                                                                                                                                                                                                                                                                                                                                                    |
| <i>motA</i>              | 2020199-2020200 (G to A)                                                                                                                                                                                                                                                                                                                                                                                                                                                                                                                                                                                                                                                                                                                                                                                                                                                                                                                                                                                                                                                                                                                                                                                                                                                                                                                                                                                                                                                                                                                                                                                                                                                                                                                                                                                                                                                                                                                                                                                                                                                                                                                                                                                                                                                                                                                                                                                                                                                                                                                                                                                                                                                                                                                                                                                                                                                                                                                                                                                                                                                                                                                                                                                                                                                                                                                                                    |
| <i>wcaH</i>              | 2191592-2191593 (I: C)                                                                                                                                                                                                                                                                                                                                                                                                                                                                                                                                                                                                                                                                                                                                                                                                                                                                                                                                                                                                                                                                                                                                                                                                                                                                                                                                                                                                                                                                                                                                                                                                                                                                                                                                                                                                                                                                                                                                                                                                                                                                                                                                                                                                                                                                                                                                                                                                                                                                                                                                                                                                                                                                                                                                                                                                                                                                                                                                                                                                                                                                                                                                                                                                                                                                                                                                                      |
| <i>mgIA</i>              | 2286206-2286207 (A to T)                                                                                                                                                                                                                                                                                                                                                                                                                                                                                                                                                                                                                                                                                                                                                                                                                                                                                                                                                                                                                                                                                                                                                                                                                                                                                                                                                                                                                                                                                                                                                                                                                                                                                                                                                                                                                                                                                                                                                                                                                                                                                                                                                                                                                                                                                                                                                                                                                                                                                                                                                                                                                                                                                                                                                                                                                                                                                                                                                                                                                                                                                                                                                                                                                                                                                                                                                    |
| <i>yeiG</i>              | 2292158-2292159 (I: G)                                                                                                                                                                                                                                                                                                                                                                                                                                                                                                                                                                                                                                                                                                                                                                                                                                                                                                                                                                                                                                                                                                                                                                                                                                                                                                                                                                                                                                                                                                                                                                                                                                                                                                                                                                                                                                                                                                                                                                                                                                                                                                                                                                                                                                                                                                                                                                                                                                                                                                                                                                                                                                                                                                                                                                                                                                                                                                                                                                                                                                                                                                                                                                                                                                                                                                                                                      |
| <i>nuoL</i>              | 2427978-2427979 (C to G)                                                                                                                                                                                                                                                                                                                                                                                                                                                                                                                                                                                                                                                                                                                                                                                                                                                                                                                                                                                                                                                                                                                                                                                                                                                                                                                                                                                                                                                                                                                                                                                                                                                                                                                                                                                                                                                                                                                                                                                                                                                                                                                                                                                                                                                                                                                                                                                                                                                                                                                                                                                                                                                                                                                                                                                                                                                                                                                                                                                                                                                                                                                                                                                                                                                                                                                                                    |
| <i>yfcY</i>              | 2500653-2500654 (CG to GC)                                                                                                                                                                                                                                                                                                                                                                                                                                                                                                                                                                                                                                                                                                                                                                                                                                                                                                                                                                                                                                                                                                                                                                                                                                                                                                                                                                                                                                                                                                                                                                                                                                                                                                                                                                                                                                                                                                                                                                                                                                                                                                                                                                                                                                                                                                                                                                                                                                                                                                                                                                                                                                                                                                                                                                                                                                                                                                                                                                                                                                                                                                                                                                                                                                                                                                                                                  |
| <i>yfeH</i>              | 2537940-2537941 (CG to GC)                                                                                                                                                                                                                                                                                                                                                                                                                                                                                                                                                                                                                                                                                                                                                                                                                                                                                                                                                                                                                                                                                                                                                                                                                                                                                                                                                                                                                                                                                                                                                                                                                                                                                                                                                                                                                                                                                                                                                                                                                                                                                                                                                                                                                                                                                                                                                                                                                                                                                                                                                                                                                                                                                                                                                                                                                                                                                                                                                                                                                                                                                                                                                                                                                                                                                                                                                  |
| STM2438                  | 2550664-2550665 (CG to GC)                                                                                                                                                                                                                                                                                                                                                                                                                                                                                                                                                                                                                                                                                                                                                                                                                                                                                                                                                                                                                                                                                                                                                                                                                                                                                                                                                                                                                                                                                                                                                                                                                                                                                                                                                                                                                                                                                                                                                                                                                                                                                                                                                                                                                                                                                                                                                                                                                                                                                                                                                                                                                                                                                                                                                                                                                                                                                                                                                                                                                                                                                                                                                                                                                                                                                                                                                  |
| STM2528                  | 2661658-2661659 (G to C)                                                                                                                                                                                                                                                                                                                                                                                                                                                                                                                                                                                                                                                                                                                                                                                                                                                                                                                                                                                                                                                                                                                                                                                                                                                                                                                                                                                                                                                                                                                                                                                                                                                                                                                                                                                                                                                                                                                                                                                                                                                                                                                                                                                                                                                                                                                                                                                                                                                                                                                                                                                                                                                                                                                                                                                                                                                                                                                                                                                                                                                                                                                                                                                                                                                                                                                                                    |
| STM2589                  | 2737590-2737591 (I: C)                                                                                                                                                                                                                                                                                                                                                                                                                                                                                                                                                                                                                                                                                                                                                                                                                                                                                                                                                                                                                                                                                                                                                                                                                                                                                                                                                                                                                                                                                                                                                                                                                                                                                                                                                                                                                                                                                                                                                                                                                                                                                                                                                                                                                                                                                                                                                                                                                                                                                                                                                                                                                                                                                                                                                                                                                                                                                                                                                                                                                                                                                                                                                                                                                                                                                                                                                      |
| STM2609                  | 2757547-2757548 (I: G)                                                                                                                                                                                                                                                                                                                                                                                                                                                                                                                                                                                                                                                                                                                                                                                                                                                                                                                                                                                                                                                                                                                                                                                                                                                                                                                                                                                                                                                                                                                                                                                                                                                                                                                                                                                                                                                                                                                                                                                                                                                                                                                                                                                                                                                                                                                                                                                                                                                                                                                                                                                                                                                                                                                                                                                                                                                                                                                                                                                                                                                                                                                                                                                                                                                                                                                                                      |
| STM2632                  | 2771659-2771660 (G to A), 2771862-2771863 (C to T), 2772072-2772073 (A to G), 2772288-2772289 (A to G), 2772485-2772486 (A to G), 2772535-2772536 (I: CTGAGACGCCACGAAACACGATTCTGTGAGCAACTGGAAC), 2772636-2772637 (A to G), 2772654-2772655 (T to C), 2772726-2772727 (A to G), 2773100-2773101 (T to C)                                                                                                                                                                                                                                                                                                                                                                                                                                                                                                                                                                                                                                                                                                                                                                                                                                                                                                                                                                                                                                                                                                                                                                                                                                                                                                                                                                                                                                                                                                                                                                                                                                                                                                                                                                                                                                                                                                                                                                                                                                                                                                                                                                                                                                                                                                                                                                                                                                                                                                                                                                                                                                                                                                                                                                                                                                                                                                                                                                                                                                                                     |
| STM2633                  | 2774323-2774324 (A to G)                                                                                                                                                                                                                                                                                                                                                                                                                                                                                                                                                                                                                                                                                                                                                                                                                                                                                                                                                                                                                                                                                                                                                                                                                                                                                                                                                                                                                                                                                                                                                                                                                                                                                                                                                                                                                                                                                                                                                                                                                                                                                                                                                                                                                                                                                                                                                                                                                                                                                                                                                                                                                                                                                                                                                                                                                                                                                                                                                                                                                                                                                                                                                                                                                                                                                                                                                    |
| <i>hin</i>               | 2914843-2914846 (D), 2914853-2914858 (D), 2914859-2914860 (A to T), 2914863-2914866 (D), 2914870-2914871 (AAC to CGT), 2914877-2914878 (I: CTT), 2914879-2914880 (I: AT), 2914880-2914881 (I: T), 2914883-2914884 (A to C), 2914886-2914887 (A to T), 2914888-2914889 (C to T), 2914891-2914892 (D), 2914895-2914896 (D), 2914897-2914901 (D), 2914903-2914904 (T to A), 2914906-2914907 (D), 2914910-2914911 (A to T), 2914912-2914913 (T to C), 2914913-2914914 (I: G), 2914917-2914918 (C to A), 2914919-2914920 (A to T), 2914921-2914922 (T to C), 2914926-2914927 (A to T), 2914927-2914928 (I: T), 2914928-2914929 (C to G), 2914930-2914931 (C to T), 2914931-2914932 (I: G), 2914932-2914933 (I: G), 2914939-2914940 (I: C), 2914941-2914942 (I: TG), 2914942-2914943 (C to T), 2914944-2914945 (I: TC), 2914948-2914949 (D), 2914950-2914951 (I: C), 2914954-2914955 (D), 2914956-2914957 (A to T), 2914958-2914959 (D), 2914960-2914961 (TG to AA), 2914964-2914965 (A to T), 2914966-2914967 (D), 2914967-2914968 (C to G), 2914971-2914972 (CCGG to TTAT), 2914976-2914977 (C to T), 2914980-2914983 (D), 2914984-2914985 (A to C), 2914990-2914991 (I: CACT), 2914992-2914993 (AG to TA), 2914999-2915000 (A to T)                                                                                                                                                                                                                                                                                                                                                                                                                                                                                                                                                                                                                                                                                                                                                                                                                                                                                                                                                                                                                                                                                                                                                                                                                                                                                                                                                                                                                                                                                                                                                                                                                                                                                                                                                                                                                                                                                                                                                                                                                                                                                                                                            |
| <i>hycC</i>              | 2996777-2996778 (CG to GC)                                                                                                                                                                                                                                                                                                                                                                                                                                                                                                                                                                                                                                                                                                                                                                                                                                                                                                                                                                                                                                                                                                                                                                                                                                                                                                                                                                                                                                                                                                                                                                                                                                                                                                                                                                                                                                                                                                                                                                                                                                                                                                                                                                                                                                                                                                                                                                                                                                                                                                                                                                                                                                                                                                                                                                                                                                                                                                                                                                                                                                                                                                                                                                                                                                                                                                                                                  |
| <i>hypD</i>              | 3001699-3001700 (I: GCG)                                                                                                                                                                                                                                                                                                                                                                                                                                                                                                                                                                                                                                                                                                                                                                                                                                                                                                                                                                                                                                                                                                                                                                                                                                                                                                                                                                                                                                                                                                                                                                                                                                                                                                                                                                                                                                                                                                                                                                                                                                                                                                                                                                                                                                                                                                                                                                                                                                                                                                                                                                                                                                                                                                                                                                                                                                                                                                                                                                                                                                                                                                                                                                                                                                                                                                                                                    |
| <i>sdaB</i>              | 3123347-3123348 (CG to GC)                                                                                                                                                                                                                                                                                                                                                                                                                                                                                                                                                                                                                                                                                                                                                                                                                                                                                                                                                                                                                                                                                                                                                                                                                                                                                                                                                                                                                                                                                                                                                                                                                                                                                                                                                                                                                                                                                                                                                                                                                                                                                                                                                                                                                                                                                                                                                                                                                                                                                                                                                                                                                                                                                                                                                                                                                                                                                                                                                                                                                                                                                                                                                                                                                                                                                                                                                  |
| <i>recC</i>              | 3154018-3154019 (CG to GC)                                                                                                                                                                                                                                                                                                                                                                                                                                                                                                                                                                                                                                                                                                                                                                                                                                                                                                                                                                                                                                                                                                                                                                                                                                                                                                                                                                                                                                                                                                                                                                                                                                                                                                                                                                                                                                                                                                                                                                                                                                                                                                                                                                                                                                                                                                                                                                                                                                                                                                                                                                                                                                                                                                                                                                                                                                                                                                                                                                                                                                                                                                                                                                                                                                                                                                                                                  |
| <i>ubiH</i>              | 3219131-3219132 (CG to GC)                                                                                                                                                                                                                                                                                                                                                                                                                                                                                                                                                                                                                                                                                                                                                                                                                                                                                                                                                                                                                                                                                                                                                                                                                                                                                                                                                                                                                                                                                                                                                                                                                                                                                                                                                                                                                                                                                                                                                                                                                                                                                                                                                                                                                                                                                                                                                                                                                                                                                                                                                                                                                                                                                                                                                                                                                                                                                                                                                                                                                                                                                                                                                                                                                                                                                                                                                  |
| STM3091                  | 3253331-3253332 (I: G)                                                                                                                                                                                                                                                                                                                                                                                                                                                                                                                                                                                                                                                                                                                                                                                                                                                                                                                                                                                                                                                                                                                                                                                                                                                                                                                                                                                                                                                                                                                                                                                                                                                                                                                                                                                                                                                                                                                                                                                                                                                                                                                                                                                                                                                                                                                                                                                                                                                                                                                                                                                                                                                                                                                                                                                                                                                                                                                                                                                                                                                                                                                                                                                                                                                                                                                                                      |
| <i>yheU</i>              | 3613714-3613715 (I: G)                                                                                                                                                                                                                                                                                                                                                                                                                                                                                                                                                                                                                                                                                                                                                                                                                                                                                                                                                                                                                                                                                                                                                                                                                                                                                                                                                                                                                                                                                                                                                                                                                                                                                                                                                                                                                                                                                                                                                                                                                                                                                                                                                                                                                                                                                                                                                                                                                                                                                                                                                                                                                                                                                                                                                                                                                                                                                                                                                                                                                                                                                                                                                                                                                                                                                                                                                      |
| <i>pckA</i>              | 3657649-3657650 (I: GCG)                                                                                                                                                                                                                                                                                                                                                                                                                                                                                                                                                                                                                                                                                                                                                                                                                                                                                                                                                                                                                                                                                                                                                                                                                                                                                                                                                                                                                                                                                                                                                                                                                                                                                                                                                                                                                                                                                                                                                                                                                                                                                                                                                                                                                                                                                                                                                                                                                                                                                                                                                                                                                                                                                                                                                                                                                                                                                                                                                                                                                                                                                                                                                                                                                                                                                                                                                    |
| <i>malQ</i>              | 3673616-3673617 (A to C)                                                                                                                                                                                                                                                                                                                                                                                                                                                                                                                                                                                                                                                                                                                                                                                                                                                                                                                                                                                                                                                                                                                                                                                                                                                                                                                                                                                                                                                                                                                                                                                                                                                                                                                                                                                                                                                                                                                                                                                                                                                                                                                                                                                                                                                                                                                                                                                                                                                                                                                                                                                                                                                                                                                                                                                                                                                                                                                                                                                                                                                                                                                                                                                                                                                                                                                                                    |
| <i>malP</i>              | 3674896-3674933 (D)                                                                                                                                                                                                                                                                                                                                                                                                                                                                                                                                                                                                                                                                                                                                                                                                                                                                                                                                                                                                                                                                                                                                                                                                                                                                                                                                                                                                                                                                                                                                                                                                                                                                                                                                                                                                                                                                                                                                                                                                                                                                                                                                                                                                                                                                                                                                                                                                                                                                                                                                                                                                                                                                                                                                                                                                                                                                                                                                                                                                                                                                                                                                                                                                                                                                                                                                                         |
| STM3633                  | 3819802-3819803 (T to C)                                                                                                                                                                                                                                                                                                                                                                                                                                                                                                                                                                                                                                                                                                                                                                                                                                                                                                                                                                                                                                                                                                                                                                                                                                                                                                                                                                                                                                                                                                                                                                                                                                                                                                                                                                                                                                                                                                                                                                                                                                                                                                                                                                                                                                                                                                                                                                                                                                                                                                                                                                                                                                                                                                                                                                                                                                                                                                                                                                                                                                                                                                                                                                                                                                                                                                                                                    |
| <i>hemE</i>              | 4384226-4384227 (G to A)                                                                                                                                                                                                                                                                                                                                                                                                                                                                                                                                                                                                                                                                                                                                                                                                                                                                                                                                                                                                                                                                                                                                                                                                                                                                                                                                                                                                                                                                                                                                                                                                                                                                                                                                                                                                                                                                                                                                                                                                                                                                                                                                                                                                                                                                                                                                                                                                                                                                                                                                                                                                                                                                                                                                                                                                                                                                                                                                                                                                                                                                                                                                                                                                                                                                                                                                                    |
| <i>rrsE</i>              | 4396191-4396192 (D)                                                                                                                                                                                                                                                                                                                                                                                                                                                                                                                                                                                                                                                                                                                                                                                                                                                                                                                                                                                                                                                                                                                                                                                                                                                                                                                                                                                                                                                                                                                                                                                                                                                                                                                                                                                                                                                                                                                                                                                                                                                                                                                                                                                                                                                                                                                                                                                                                                                                                                                                                                                                                                                                                                                                                                                                                                                                                                                                                                                                                                                                                                                                                                                                                                                                                                                                                         |
| <i>rpsR</i>              | 4631399-4631400 (CG to GC)                                                                                                                                                                                                                                                                                                                                                                                                                                                                                                                                                                                                                                                                                                                                                                                                                                                                                                                                                                                                                                                                                                                                                                                                                                                                                                                                                                                                                                                                                                                                                                                                                                                                                                                                                                                                                                                                                                                                                                                                                                                                                                                                                                                                                                                                                                                                                                                                                                                                                                                                                                                                                                                                                                                                                                                                                                                                                                                                                                                                                                                                                                                                                                                                                                                                                                                                                  |
| STM4447                  | 4689232-4689233 (I: G)                                                                                                                                                                                                                                                                                                                                                                                                                                                                                                                                                                                                                                                                                                                                                                                                                                                                                                                                                                                                                                                                                                                                                                                                                                                                                                                                                                                                                                                                                                                                                                                                                                                                                                                                                                                                                                                                                                                                                                                                                                                                                                                                                                                                                                                                                                                                                                                                                                                                                                                                                                                                                                                                                                                                                                                                                                                                                                                                                                                                                                                                                                                                                                                                                                                                                                                                                      |
| <i>smp</i>               | 4832866-4832867 (CG to GC)                                                                                                                                                                                                                                                                                                                                                                                                                                                                                                                                                                                                                                                                                                                                                                                                                                                                                                                                                                                                                                                                                                                                                                                                                                                                                                                                                                                                                                                                                                                                                                                                                                                                                                                                                                                                                                                                                                                                                                                                                                                                                                                                                                                                                                                                                                                                                                                                                                                                                                                                                                                                                                                                                                                                                                                                                                                                                                                                                                                                                                                                                                                                                                                                                                                                                                                                                  |
| <i>Intergenic region</i> | 220823-220824 (I: C), 288834-288835 (C to T), 288842-288843 (C to A), 288852-288853 (C to T), 510549-510550 (I: C), 520410-520411 (I: C), 1208417-1208418 (I: C), 1256604-1256605 (I: C), 1430154-1430155 (I: C), 1435558-1435559 (D), 1554185-1554186 (I: C), 1670336-1670337 (I: C), 1841403-1841404 (G to A), 2627554-2627555 (I: C), 2682820-2682821 (I: G), 2834544-2834545 (I: C), 2914778-2914779 (D), 2914781-2914782 (G to C), 2914786-2914787 (CC to GT), 2914789-2914791 (D), 2914793-2914794 (I: CC), 2914796-2914800 (D), 2914801-2914802 (I: T), 2914802-2914803 (G to T), 2914803-2914804 (I: C), 2914806-2914809 (D), 2914809-2914810 (A to G), 2914810-2914811 (I: G), 2914813-2914814 (T to A), 2914816-2914817 (I: AGG), 2914822-2914823 (D), 2914824-2914825 (I: CACT), 2914827-2914830 (D), 2914832-2914833 (I: C), 2914834-2914835 (G to T), 2914838-2914840 (D), 2914841-2914842 (A to T), 2915500-2915501 (I: T), 2915501-2915502 (I: T), 2915502-2915503 (A to G), 2915503-2915504 (A to G), 2915510-2915511 (D), 2915511-2915512 (AAA to TCC), 2915516-2915517 (I: C), 2915519-2915520 (A to C), 2915522-2915523 (A to G), 2915524-2915525 (T to G), 2915526-2915527 (D), 2915528-2915529 (A to T), 2915531-2915532 (TA to CC), 2915535-2915536 (A to T), 2915537-2915538 (CA to TT), 2915541-2915542 (T to C), 2915545-2915546 (G to C), 2915547-2915548 (G to C), 2915554-2915555 (G to T), 2915555-2915556 (I: GTT), 2915558-2915559 (T: GGC), 2915561-2915565 (D), 2915567-2915568 (C to G), 2915569-2915570 (TA to GG), 2915572-2915573 (D), 2915575-2915576 (A to G), 2915576-2915577 (I: A), 2915580-2915581 (CA to TT), 2915584-2915585 (T to C), 2915585-2915586 (I: C), 2915588-2915587 (I: G), 2915588-2915589 (G to T), 2915592-2915594 (D), 2915594-2915595 (A to G), 2915597-2915598 (D), 2915605-2915606 (D), 2915607-2915608 (D), 2915609-2915610 (D), 2915610-2915611 (C to G), 2915612-2915613 (A to G), 2915614-2915615 (A to T), 2915619-2915620 (G to A), 2915621-2915622 (A to T), 2915623-2915624 (T to G), 2915626-2915627 (D), 2915629-2915630 (G to A), 2915631-2915632 (A to T), 2915634-2915635 (I: C), 2915636-2915637 (I: A), 2915638-2915639 (I: ACGC), 2915639-2915640 (I: G), 2915641-2915642 (T to A), 2915646-2915647 (A to G), 2915648-2915649 (A to T), 2915651-2915652 (D), 2915654-2915655 (A to T), 2915656-2915658 (D), 2915660-2915663 (D), 2915668-2915669 (ACG to GTT), 2915674-2915675 (I: CCC), 2915677-2915678 (I: T), 2915678-2915679 (I: T), 2915679-2915680 (I: CCC), 2915686-2915687 (I: GCC), 2915687-2915688 (I: TG), 2915689-2915690 (G to T), 2915693-2915694 (A to C), 2915695-2915696 (D), 2915698-2915699 (I: TTA), 2915701-2915705 (D), 2915706-2915707 (I: A), 2915712-2915715 (D), 2915718-2915719 (T to A), 2915721-2915724 (D), 2915725-2915726 (GG to TT), 2915728-2915729 (A to T), 2915730-2915731 (I: T), 2915731-2915732 (I: G), 2915732-2915733 (I: TTT), 2915734-2915735 (GG to CT), 2915738-2915739 (I: GG), 2915740-2915741 (AC to GG), 2915745-2915746 (I: C), 2915746-2915747 (G to T), 3127648-3127649 (D), 3676852-3676853 (I: A), 3694174-3694175 (I: G), 4031932-4031933 (I: C), 4350854-4350855 (CA to GC), 4433262-4433263 (I: CG), 4459984-4459985 (I: C), 4606271-4606272 (D), 4673418-4673419 (I: T), 4675813-4675814 (I: C), pSLT28092-28098 <sup>d</sup> (D) |

a. Genetic location is based on the nucleotide numbers of genomic sequence (NC\_003197.1)<sup>g</sup> or of pSLT plasmid (NC\_003277.1)<sup>c</sup> in LT2 strain  
b. I, insertion; D, deletion; N to N, conversion

**Supplementary Table 2: Strains and variations of refactored operons that appear in this study**

| Name <sup>a</sup> | Refactored operon <sup>b</sup> |                              | Regulation <sup>c</sup> | Genotype <sup>d</sup> | Figure <sup>e,f</sup> |                                                       |
|-------------------|--------------------------------|------------------------------|-------------------------|-----------------------|-----------------------|-------------------------------------------------------|
|                   | <i>prg-org</i>                 | <i>inv-spa</i>               |                         |                       |                       |                                                       |
| DW01              |                                |                              |                         | Wild type             |                       |                                                       |
| MR05              |                                |                              |                         | $\Delta flhDC$        |                       | 2b left, 4b                                           |
| MR15              | <i>native prg-org</i>          |                              | $P_{prgH}$              | $\Delta prgH-orgC$    |                       | 2a (lane 3)                                           |
| MR16              |                                | <i>native inv-spa</i>        | $P_{BAD}$               | $\Delta invF-spaS$    |                       | 2d (lane 3), 2e (lane 1),<br>2f (lane 1), 2h (lane 3) |
| MR17              | <i>prg-org</i> <sup>R1</sup>   | -                            | $P_{tac}$               | $\Delta prgH-orgC$    |                       | 2a (lane 4)                                           |
| MR18              | -                              | <i>inv-spa</i> <sup>R1</sup> | $P_{BAD}$               |                       | $\Delta invF-spaS$    | 2d (lane 4)                                           |
| MR19              | -                              | <i>inv-spa</i> <sup>R2</sup> | $P_{BAD}$               |                       | $\Delta invH-spaS$    | 2j (lane3), S7 (lane4)                                |
| MR20              | <i>prg-org</i> <sup>R2</sup>   | -                            | pMR_controller1         | $\Delta prgH-orgC$    |                       | S3c                                                   |
| MR21              | -                              | <i>inv-spa</i> <sup>R3</sup> | pMR_controller2         |                       | $\Delta invH-spaS$    | S8c                                                   |
| MR22              | <i>prg-org</i> <sup>R3</sup>   | -                            | pMR_controller1         | $\Delta prgH-orgC$    |                       | S3d                                                   |
| MR23              | <i>prg-org</i> <sup>R3</sup>   | <i>inv-spa</i> <sup>R3</sup> | pMR_controller3         | $\Delta prgH-orgC$    | $\Delta invH-spaS$    | 2b right, 2c (left lane)                              |
| MR24              | <i>prg-org</i> <sup>R4</sup>   | <i>inv-spa</i> <sup>R3</sup> | pMR_controller3         | $\Delta prgH-orgC$    | $\Delta invH-spaS$    | $\Delta flhDC$<br>2c (right lane), S9                 |
| MR25              | <i>prg-org</i> <sup>R4</sup>   | <i>inv-spa</i> <sup>R3</sup> | pMR_controller3         | $\Delta prgH-orgC$    | $\Delta invH-spaS$    | 3b                                                    |
| MR26              | <i>prg-org</i> <sup>R4</sup>   | <i>inv-spa</i> <sup>R3</sup> | pMR_controller3         | $\Delta SPI-1$        |                       | 3c (lane 3), 3e (lane 3)                              |
| MR27              | <i>prg-org</i> <sup>R5</sup>   | <i>inv-spa</i> <sup>R4</sup> | pMR_controller3         | $\Delta SPI-1$        |                       | 3e (lane 4), 4a, 4d, 4e,<br>S11 (lane 3)              |
| MR28              | <i>prg-org</i> <sup>R5</sup>   | <i>inv-spa</i> <sup>R3</sup> | pMR_controller3         | $\Delta SPI-1$        |                       | S11 (lane 2)                                          |
| MR29              | <i>prg-org</i> <sup>R4</sup>   | <i>inv-spa</i> <sup>R4</sup> | pMR_controller3         | $\Delta SPI-1$        | $\Delta ompD$         | 3e (lane5)                                            |
| MR30              | <i>prg-org</i> <sup>R5</sup>   | <i>inv-spa</i> <sup>R4</sup> | pMR_controller3         | $\Delta SPI-1$        | $\Delta flhDC$        | 4c                                                    |

a. All strains are based on the DW01 parent. Except DW01 parent strain, all strains contain the reporter plasmid (*pMR\_reporter*; Supplementary Figure 16).

b. The superscripts refer to the variant of the operon shown in Supplementary Figure 1.

c. Gene expression was regulated by inducible promoter or by bacteriophage RNAP based-controller system on a plasmid.

d. Oligonucleotides sequences used for construction of genomic knockout were described in Supplementary Table 3.

e. The main text figures where this strain is used are listed.

f. The supplementary information figures where this strain is used are listed.

**Supplementary Table 3: Generation of knockout strains**

| Strain <sup>a</sup> | Genotype                                               | Oligonucleotides <sup>b</sup>                                                                                                                                    | Source <sup>c</sup> |
|---------------------|--------------------------------------------------------|------------------------------------------------------------------------------------------------------------------------------------------------------------------|---------------------|
| MR01                | $\Delta prgH$ -orgC                                    | F: <u>cctgtg</u> cggtaatctgctgctatcgagaacgacagacatc <u>gtaggctggagctgcttc</u><br>R: <u>acaccata</u> ccttatcacaatcgccagcaatgggggttcac <u>atatgaatatcctcctta</u>   |                     |
| MR02                | $\Delta invF$ -spaS                                    | F: <u>agcattg</u> gtttatacagacgtgttccgcgcaaaagctgcat <u>gtaggctggagctgcttc</u><br>R: <u>aaaaacg</u> ccaatgaatacatcgctactgccttacgcgcc <u>atatgaatatcctcctta</u>   |                     |
| MR03                | $\Delta invH$ -spaS                                    | F: <u>taattata</u> tcatgatgagttcagccaacggtgatatggcct <u>gtaggctggagctgcttc</u><br>R: <u>aaaaacg</u> ccaatgaatacatcgctactgccttacgcgcc <u>atatgaatatcctcctta</u>   |                     |
| MR04                | $\Delta prgH$ -orgC $\Delta invH$ -spaS                |                                                                                                                                                                  | P22                 |
| MR05                | $\Delta flhDC$                                         |                                                                                                                                                                  | 5                   |
| MR06                | $\Delta flhDC$ $\Delta prgH$ -orgC $\Delta invH$ -spaS |                                                                                                                                                                  | P22                 |
| MR07                | $\Delta SPI$ -1                                        | F: <u>taattata</u> tcatgatgagttcagccaacggtgatatggcct <u>gtaggctggagctgcttc</u><br>R: <u>gctgga</u> aggatttccctctggcaggcaacctataatttcac <u>atatgaatatcctcctta</u> |                     |
| MR08                | $\Delta invH$ -orgC                                    | F: <u>taattata</u> tcatgatgagttcagccaacggtgatatggcct <u>gtaggctggagctgcttc</u><br>R: <u>acaccata</u> ccttatcacaatcgccagcaatgggggttcac <u>atatgaatatcctcctta</u>  |                     |
| MR09                | $\Delta invH$ -iacP                                    | F: <u>taattata</u> tcatgatgagttcagccaacggtgatatggcct <u>gtaggctggagctgcttc</u><br>R: <u>cagccata</u> cctgaaacgggtactacatgtgtgatgattttc <u>atatgaatatcctcctta</u> |                     |
| MR10                | $\Delta prgH$ -orgC $\Delta invH$ -iacP                |                                                                                                                                                                  | P22                 |
| MR11                | $\Delta iagB$                                          | F: <u>tactttt</u> tagaactatctgaaagtaagctatctgtataat <u>gtaggctggagctgcttc</u><br>R: <u>taaaatc</u> tgagagaggagatgacattatctttttatcat <u>atatgaatatcctcctta</u>    |                     |
| MR12                | $\Delta ompD$                                          | F: <u>gttgagg</u> aaacacgctaagaaaattataaggattataat <u>gtaggctggagctgcttc</u><br>R: <u>ttgattt</u> tgtaatcaacgaaggtggacatgtttttgc <u>atatgaatatcctcctta</u>       |                     |
| MR13                | $\Delta SPI$ -1 $\Delta ompD$                          |                                                                                                                                                                  | P22                 |
| MR14                | $\Delta flhDC$ $\Delta SPI$ -1                         |                                                                                                                                                                  | P22                 |
| MR31                | $\Delta invH$ -sipC                                    | F: <u>taattata</u> tcatgatgagttcagccaacggtgatatggcct <u>gtaggctggagctgcttc</u><br>R: <u>cagccata</u> cctgaaacgggtactacatgtgtgatgattttc <u>atatgaatatcctcctta</u> |                     |
| MR32                | $\Delta prgH$ -orgC $\Delta invH$ -sipC                |                                                                                                                                                                  | P22                 |

a. All strains are based on *Salmonella enterica* serovar Typhimurium LT2 DW01.

b. Underlined sequences are priming site to template plasmid pKD3 (a) or pKD4 (b) <sup>6</sup>.

c. Unless otherwise noted, the strain was constructed as part of this study. P22 indicates that the strain was built fusing P22 transduction.

**Supplementary Table 4: Point mutations to *spaO***

| Location (nt) <sup>a</sup> | Mutation                 |
|----------------------------|--------------------------|
| 496                        | <i>ttg</i> to <i>tta</i> |
| 499                        | <i>ctg</i> to <i>ctt</i> |
| 529                        | <i>ctg</i> to <i>ctt</i> |
| 532                        | <i>att</i> to <i>atc</i> |
| 606                        | <i>att</i> to <i>atc</i> |
| 609                        | <i>gtg</i> to <i>gtt</i> |

*a.* Indicates the location from the first nucleotide of *spaO*.

**Supplementary Table 5: RBS sequences designed for spaOs**

| Strength <sup>a</sup> | Sequence                            |
|-----------------------|-------------------------------------|
| 1000                  | cttgggcacgcgtccataaggtatacgaccactag |
| 2000                  | ttaggtcatttcaaccgtgttgaaggggaattatt |
| 4500                  | cttgggcacgcgtccattaaatcgaggaccactag |
| 5000 (a)              | cttgggcacgcgtccatacctcgtaagaccactag |
| 5000 (b)              | gttatagtattttatagacgaggtattttatat   |
| 7500                  | cttgggcacgcgtccatatacggtaggaccactag |
| 10000                 | taggtaggcgcccaccgaagaaagaggacacacgt |
| 20000                 | acaaaaacaagagaagagtaaggcataacaat    |

*a. The designed translational initiation rate of the RBS in artificial units as predicted by the RBS Calculator. (a) and (b) refer to two designs of the same strength.*

**Supplementary Table 6: Genetic parts used in this study**

| Part Number | Part Type                      | Sequence                                                                                                                                                                                                                                                                                                                                                                                                                                                                                                                                                                                                                                                                                                                                                                                                                                                                                                                                                                                                                                                                                                                                                                                                                                                        |
|-------------|--------------------------------|-----------------------------------------------------------------------------------------------------------------------------------------------------------------------------------------------------------------------------------------------------------------------------------------------------------------------------------------------------------------------------------------------------------------------------------------------------------------------------------------------------------------------------------------------------------------------------------------------------------------------------------------------------------------------------------------------------------------------------------------------------------------------------------------------------------------------------------------------------------------------------------------------------------------------------------------------------------------------------------------------------------------------------------------------------------------------------------------------------------------------------------------------------------------------------------------------------------------------------------------------------------------|
| SBa_001697  | T3.1 promoter                  | taataaccctcactacaggcaga                                                                                                                                                                                                                                                                                                                                                                                                                                                                                                                                                                                                                                                                                                                                                                                                                                                                                                                                                                                                                                                                                                                                                                                                                                         |
| SBa_001698  | K1F promoter                   | taataactatcactatagggaga                                                                                                                                                                                                                                                                                                                                                                                                                                                                                                                                                                                                                                                                                                                                                                                                                                                                                                                                                                                                                                                                                                                                                                                                                                         |
| SBa_001749  | J23100 promoter                | ttgacggctagctcagtcctaggtacagtgctagct                                                                                                                                                                                                                                                                                                                                                                                                                                                                                                                                                                                                                                                                                                                                                                                                                                                                                                                                                                                                                                                                                                                                                                                                                            |
| SBa_001750  | J23101 promoter                | tttacagctagctcagtcctaggtattatgctagc                                                                                                                                                                                                                                                                                                                                                                                                                                                                                                                                                                                                                                                                                                                                                                                                                                                                                                                                                                                                                                                                                                                                                                                                                             |
| SBa_001737  | J23110 promoter                | tttacggctagctcagtcctaggtacaatgctagc                                                                                                                                                                                                                                                                                                                                                                                                                                                                                                                                                                                                                                                                                                                                                                                                                                                                                                                                                                                                                                                                                                                                                                                                                             |
| SBa_001738  | P <sub>tac</sub> promoter      | gagctgttgacaattaatcatccggctcgtataatgtgtggaattgtgagcggataacaattctgctgctatag                                                                                                                                                                                                                                                                                                                                                                                                                                                                                                                                                                                                                                                                                                                                                                                                                                                                                                                                                                                                                                                                                                                                                                                      |
| SBa_001739  | P <sub>BAD</sub> promoter      | agaaaccaattgtccatattgcatcagacattgcccgtcactcgtcttttactggctcttctcgtaaccaaacccgtaaaccccgcttattaaa<br>agcattctgttaacaagcgggaccaaacgcatgacaaaaacgcttaacaaaagtgtctataatcagcggcagaaaagtcacattgatattttgc<br>acggcgtcacactttgctatgcatagcattttttatccataagattagcggatccctacctg                                                                                                                                                                                                                                                                                                                                                                                                                                                                                                                                                                                                                                                                                                                                                                                                                                                                                                                                                                                              |
| SBa_001740  | P <sub>tac-O2</sub> promoter   | gagctgttgacaattaatcatccggctcgtataatgtgtggaattgtgagcggataacaattcgacgtacggtggaattgtgagcggataaca<br>att                                                                                                                                                                                                                                                                                                                                                                                                                                                                                                                                                                                                                                                                                                                                                                                                                                                                                                                                                                                                                                                                                                                                                            |
| SBa_001741  | P <sub>lux</sub> promoter      | acctgtaggatcgtacaggtttacgcaagaaaatggtttggttatagtogaataaa                                                                                                                                                                                                                                                                                                                                                                                                                                                                                                                                                                                                                                                                                                                                                                                                                                                                                                                                                                                                                                                                                                                                                                                                        |
| SBa_001752  | RiboJ                          | agctgtcacggatgtgctttccggtctgatgagtcctgaggacgaaacagcctctacaataattttgttaa                                                                                                                                                                                                                                                                                                                                                                                                                                                                                                                                                                                                                                                                                                                                                                                                                                                                                                                                                                                                                                                                                                                                                                                         |
| SBa_001699  | RBS                            | tactagagattaaaggaggagaattaaagc                                                                                                                                                                                                                                                                                                                                                                                                                                                                                                                                                                                                                                                                                                                                                                                                                                                                                                                                                                                                                                                                                                                                                                                                                                  |
| SBa_001700  | RBS <sup>a</sup>               | cctaggattaaaggaggataaattaaagc                                                                                                                                                                                                                                                                                                                                                                                                                                                                                                                                                                                                                                                                                                                                                                                                                                                                                                                                                                                                                                                                                                                                                                                                                                   |
| SBa_001701  | RBS <sup>a</sup>               | gctagcattaaacaggataataagc                                                                                                                                                                                                                                                                                                                                                                                                                                                                                                                                                                                                                                                                                                                                                                                                                                                                                                                                                                                                                                                                                                                                                                                                                                       |
| SBa_001702  | RBS <sup>a</sup>               | agcttattaaacaggataataagc                                                                                                                                                                                                                                                                                                                                                                                                                                                                                                                                                                                                                                                                                                                                                                                                                                                                                                                                                                                                                                                                                                                                                                                                                                        |
| SBa_001703  | RBS <sup>a</sup>               | ggtaccgaaagaaggacagactag                                                                                                                                                                                                                                                                                                                                                                                                                                                                                                                                                                                                                                                                                                                                                                                                                                                                                                                                                                                                                                                                                                                                                                                                                                        |
| SBa_001704  | RBS <sup>a</sup>               | agatctgaaagaaggacagactag                                                                                                                                                                                                                                                                                                                                                                                                                                                                                                                                                                                                                                                                                                                                                                                                                                                                                                                                                                                                                                                                                                                                                                                                                                        |
| SBa_001705  | RBS                            | tactagagaaaaaaagctctaaaagattaagaggggtaaacat                                                                                                                                                                                                                                                                                                                                                                                                                                                                                                                                                                                                                                                                                                                                                                                                                                                                                                                                                                                                                                                                                                                                                                                                                     |
| SBa_001706  | RBS                            | ctggggcacgcgtccattaaagaaggaggaattaaagc                                                                                                                                                                                                                                                                                                                                                                                                                                                                                                                                                                                                                                                                                                                                                                                                                                                                                                                                                                                                                                                                                                                                                                                                                          |
| SBa_001707  | RBS                            | cgcttattcattcccagacatcggagtagcc                                                                                                                                                                                                                                                                                                                                                                                                                                                                                                                                                                                                                                                                                                                                                                                                                                                                                                                                                                                                                                                                                                                                                                                                                                 |
| SBa_001708  | RBS <sup>a</sup>               | gacgtccttgggcacgcgtccattaaacaggagtaattaaagc                                                                                                                                                                                                                                                                                                                                                                                                                                                                                                                                                                                                                                                                                                                                                                                                                                                                                                                                                                                                                                                                                                                                                                                                                     |
| SBa_001709  | RBS <sup>a</sup>               | atttaaatgctagccttgggcacgcgtccattaaagaggaccaattaaagc                                                                                                                                                                                                                                                                                                                                                                                                                                                                                                                                                                                                                                                                                                                                                                                                                                                                                                                                                                                                                                                                                                                                                                                                             |
| SBa_001710  | RBS                            | acaaaaacaagagaagagtaaggcacaataa                                                                                                                                                                                                                                                                                                                                                                                                                                                                                                                                                                                                                                                                                                                                                                                                                                                                                                                                                                                                                                                                                                                                                                                                                                 |
| SBa_001711  | RBS                            | ctgggcacgcgtccatgaaagaaacacatactag                                                                                                                                                                                                                                                                                                                                                                                                                                                                                                                                                                                                                                                                                                                                                                                                                                                                                                                                                                                                                                                                                                                                                                                                                              |
| SBa_001712  | RBS <sup>a</sup>               | gagctctgggcacgcgtccattaaagagaaaattattagc                                                                                                                                                                                                                                                                                                                                                                                                                                                                                                                                                                                                                                                                                                                                                                                                                                                                                                                                                                                                                                                                                                                                                                                                                        |
| SBa_001713  | RBS                            | ctgggcacgcgtccatgaaagacaggaccactag                                                                                                                                                                                                                                                                                                                                                                                                                                                                                                                                                                                                                                                                                                                                                                                                                                                                                                                                                                                                                                                                                                                                                                                                                              |
| SBa_001714  | RBS <sup>a</sup>               | ctgcaggtttaaaccttgggcacgcgtccatgaaagacaggaccactag                                                                                                                                                                                                                                                                                                                                                                                                                                                                                                                                                                                                                                                                                                                                                                                                                                                                                                                                                                                                                                                                                                                                                                                                               |
| SBa_001715  | RBS <sup>a</sup>               | agatctcttgggcacgcgtccattaaagaggaccaattaaagc                                                                                                                                                                                                                                                                                                                                                                                                                                                                                                                                                                                                                                                                                                                                                                                                                                                                                                                                                                                                                                                                                                                                                                                                                     |
| SBa_001742  | RBS <sup>a</sup>               | ggatccatcagataaacgcagctcgttaagttctacaagaatcggtgacagataaacaggagtaagta                                                                                                                                                                                                                                                                                                                                                                                                                                                                                                                                                                                                                                                                                                                                                                                                                                                                                                                                                                                                                                                                                                                                                                                            |
| SBa_001743  | RBS                            | agaaaaatttcgaaaataaacagctcctaactaaaaa                                                                                                                                                                                                                                                                                                                                                                                                                                                                                                                                                                                                                                                                                                                                                                                                                                                                                                                                                                                                                                                                                                                                                                                                                           |
| SBa_001744  | RBS                            | tcacacaggaaccgggttcg                                                                                                                                                                                                                                                                                                                                                                                                                                                                                                                                                                                                                                                                                                                                                                                                                                                                                                                                                                                                                                                                                                                                                                                                                                            |
| SBa_001751  | RBS                            | tcacacaggaag                                                                                                                                                                                                                                                                                                                                                                                                                                                                                                                                                                                                                                                                                                                                                                                                                                                                                                                                                                                                                                                                                                                                                                                                                                                    |
| SBa_001716  | Codon optimized<br><i>prgI</i> | atggctactccgtggtctggttatctggatgatgtttctgcaaaatttgacacgggtgttgacaacttgcaaacccaagttaccogaagccctgg<br>acaagctggctgcgaagccgtccgatccggcgtctgcccggctatcaatccaaactgtctgagtaaaacttgtaaccgttaagcgcagtcgaa<br>cacggtcaaggtcttcaaaagatattgatgcagcgtatttcagaactttcgttagtaa                                                                                                                                                                                                                                                                                                                                                                                                                                                                                                                                                                                                                                                                                                                                                                                                                                                                                                                                                                                                  |
| SBa_001717  | Codon optimized<br><i>prgJ</i> | atgtctatcgcgactatcgtgcctgaaaatgcgcttattggtcaagcgggtgaaattcgcagcatgaaaacggacatcgtcagcttggacgacc<br>gtttgctgcaagcattttcgggcagcggccatcgtaccgcctcgtataagcagaccattaccaatcgcattgaaagccctaactcgttaccga<br>tccgaaggagctggcgtatagccaggaatgatttccgactacaactctgactcagcagcagcgttagcaccctgacgcgtaagggcgttggcgc<br>gttgagactttgctgcgtctcctgatag                                                                                                                                                                                                                                                                                                                                                                                                                                                                                                                                                                                                                                                                                                                                                                                                                                                                                                                               |
| SBa_001718  | Codon optimized<br><i>prgH</i> | atggaactagcaagggagaaaacgattacgtcccctggctcgtatctcgtctcgttgaactcgtccctgaacgggttgtaattccctcgtc<br>tgactggctcgtacgctgtctcgtcgtggctcagagcagatgctctgaccgcgtctggctcagctgccggacattcctcgcgactcctcttcaatccc<br>gctggatcatggcgggtgtaatttcagatccaagtggacactgacgcgacggaatacctcctgcagaaactgaaagaggcacaactccgagac<br>cgtcctcgtcactgaacaccoccatccaagttgggtaactgctgattttgatctcgggagagcagcggcgtggcggcaaacggcgggaga<br>agttggaactctcggaaaaaagcaaccgcgtttaaaccggcactcgtcgcgcactggcgggtttcttattcctgggtatcgcaacgg<br>tggcaacctgtggattctgaaactcgcgcgaactcaagcagccgaattggacagcctgtgggtcaggagaaggagcgttttcaggtctgctgccc<br>ggtcgcgacaagatgctgtatgctcgcgcgcaaaaacgaacgcgcgacaacctgtgggcagctcaagtcctggcagcggcggatcagcgtaaaaac<br>cacgcgttataatgaaaatgaggagataaacgattacgcatctggctggacagctattatccacaactggcattatccagctccattttgga<br>tgaaccagctaaagcgggtgtttggctgtcccgtcaacgcacaacagatgagcaagaaagagctggaggtgctgtcccagaaattgcgtcgcctg<br>atgccgtacgcgacagcgtcaatattactctgatggatgacgtgacgcgacgagcgaacgcgagggcaggtctgaaacaacaggcgtccat<br>acagcccgttaaccacaaggtgggttactgttcttactcaggggccttggacagcgttgagattctcgtcgcgcgcaagtttctgcaactc<br>ctattatcgtacctgggtggtcgttacgttcaattcgcgaattgaaatgaaagacagattggctgaaagggcgcctcgtccaatcaggtgcccga<br>ggctacataaagatgagcccaggtcattggattttccgctcctctgtaaatag |
| SBa_001719  | Codon optimized<br><i>prgK</i> | atgatccgcgcttacctgtataacctcttctgctggttatgactttggcggcgtgtaaaagataaggatctgctgaaagccttggaccaagagcaag<br>cgaatgaggtcattgctggttctgcaaatgcaacaacttgaggctaaacaagattgatagcggcaagctgggttacagcattaccctcgcgggaacc<br>ggatttcaaccgcggcagtgattggatgaaacctaccagttgcccgcctcggcgcgctgctgaaatcgcccaaatgtttccggcagacagcctg<br>gttagctctcccgctcgggagaaagcagctctgactcggcgattgaaacagcgcctggagcagctgctgcaaacgatggaaggtgtctgctcgg<br>ccggttccacatcagctatgatattgatcggggcagaaacggctcgtccgcctaagccgggtgcacctcgtcgttggcgggtgtaagaacgcgg<br>ttcccccttggcccatcagatttcggatattaaagcctctcctgaaaaacagcttcggcggatgtgactatgataaacatcagcgtggtctcctcc<br>gagcgtagcgaagcagcttgcaggcgcggcgctcaagcgcgaatagctctcgtacctcggattgtgctgatattcctgttctgctg<br>ttatgagcggcgggtttcgggtctggttactcaaaaaatcaactatgcccgttaataagaaaggcattactcgcgatgcaaacggcaaaagtccagcaa<br>cagtaataaa                                                                                                                                                                                                                                                                                                                                                                                                                                 |
| SBa_001720  | Codon optimized<br><i>orgA</i> | atgatctgctgaaccgctcaaatgaaacgctcaaacactgccaattatctggcaacgcattattttcgaaccactgctctatattcaccocaac<br>gtctgcaaatcgcgcggagatgatcgtcgtccggcagcgtgcccgaagcgaatgagctgattttggcggcgtggcgtttgaaagaaacgggtga<br>gaaggagtgcattcagaatagcctgacgcagctgtggttggctcaattggcgcgctcggcgcaggttgcctacctgctgggttgcacaagtgtg<br>cgtgctgacctggccgtcaagggtgcttattggcctgcggcagctggcgcagcagctcctggcgtgcaaccaggtatcgtcctgtcgggttt<br>gtaataaggcgcgcaaacacgcttctcgtcgtcgttggttacgccaactgaaacgcgctgaaatgagttctcgcggagagcttggcccaaacg<br>ctttcctctgctgtttccaccgttccatcgaggagcactgaaacaagatgacgtggagatgagcactcctgctgctggcctcgaatacgcgcaa<br>aagtatcctaaaccgctccggcgtttgctgctcaataa                                                                                                                                                                                                                                                                                                                                                                                                                                                                                                                                                                                                                 |



|            |                                 |                                                                                                                                                                                                                                                                                                                                                                                                                                                                                                                                                                                                                                                                                                                                                                                                                                                                                                                                                                                                                                                                                                                                                                                                                                                                                                                                                                                                                                                                                                                                                                                                                                                                                                                                                                                                                                                                                                                                                                                                                                                                                                                                                                                                                                                                                                                                                                                                                                                                                                                                                                                                                                                                                                                                                                                                                                                                                                                                                                                                                                                                                                                                                                                                                                                                                                                                                                                                                                                                                                                                                                                                                                                                                                                                                                                                                                                                                                                                                                                                                                                                                                                                                                                                                                                                                                                                                                                                                                                                                                                                                                                                                                                                                                                                                                                                                                                                                                                                                                                                                                                                                                                                                                                                                                                                                                                                                                                                                                                                                                                                                                                                                                                                                                                                                                                                                                                                                                                                                                                                                                                                                                                                                                                                                                                                                                                                                                                                                                                                                                                                                                                                                                                                                                                                                                                                                                                                                                                                                                                                                                                                                                                                                                                                                                                                                                                                                                                                                                                                                                                                                                                                                                                                                                                                                                                                                                                                                                                                                                                                                                                                                                                                                                                                                                                                                                                                                                                                                                                                                                                                                                                                                                                                                                                                                                                                                                                                                                                                                                                                                                                                                                                                                                                                                                                                                                                                                                                                                                                                                                                                                                                                                                                                                                                                                                                                                                                                                                                                                                                                                                                                                                                                                                                                                                                                                                                                                                                                                                                                                                                                                                                                                                                                                                                                                                                                                                                                                                                                                                                                                                                                                                                                                                                                                                                                                                                                                                                                                                                                                                                                                                                                                                                                                                                                                                                                                                                                                                                                                                                                                                                                                                                                                                                                                                                                                                                                                                                                                                                                                                                                                                                                                                                                                                                                                                                                                                                                                                                                                                                                                                                                                                                                                                                                                                                                                                                                                                                                                                                                                                                                                                                                                                                                                                                                                                                                                                                                                                                                                                                                                                                                                                                                                                                                                                                                                                                                                                                                                                                                                                                                                                                                                                                                                                                                                                                                                                                                                                                                         |
|------------|---------------------------------|-----------------------------------------------------------------------------------------------------------------------------------------------------------------------------------------------------------------------------------------------------------------------------------------------------------------------------------------------------------------------------------------------------------------------------------------------------------------------------------------------------------------------------------------------------------------------------------------------------------------------------------------------------------------------------------------------------------------------------------------------------------------------------------------------------------------------------------------------------------------------------------------------------------------------------------------------------------------------------------------------------------------------------------------------------------------------------------------------------------------------------------------------------------------------------------------------------------------------------------------------------------------------------------------------------------------------------------------------------------------------------------------------------------------------------------------------------------------------------------------------------------------------------------------------------------------------------------------------------------------------------------------------------------------------------------------------------------------------------------------------------------------------------------------------------------------------------------------------------------------------------------------------------------------------------------------------------------------------------------------------------------------------------------------------------------------------------------------------------------------------------------------------------------------------------------------------------------------------------------------------------------------------------------------------------------------------------------------------------------------------------------------------------------------------------------------------------------------------------------------------------------------------------------------------------------------------------------------------------------------------------------------------------------------------------------------------------------------------------------------------------------------------------------------------------------------------------------------------------------------------------------------------------------------------------------------------------------------------------------------------------------------------------------------------------------------------------------------------------------------------------------------------------------------------------------------------------------------------------------------------------------------------------------------------------------------------------------------------------------------------------------------------------------------------------------------------------------------------------------------------------------------------------------------------------------------------------------------------------------------------------------------------------------------------------------------------------------------------------------------------------------------------------------------------------------------------------------------------------------------------------------------------------------------------------------------------------------------------------------------------------------------------------------------------------------------------------------------------------------------------------------------------------------------------------------------------------------------------------------------------------------------------------------------------------------------------------------------------------------------------------------------------------------------------------------------------------------------------------------------------------------------------------------------------------------------------------------------------------------------------------------------------------------------------------------------------------------------------------------------------------------------------------------------------------------------------------------------------------------------------------------------------------------------------------------------------------------------------------------------------------------------------------------------------------------------------------------------------------------------------------------------------------------------------------------------------------------------------------------------------------------------------------------------------------------------------------------------------------------------------------------------------------------------------------------------------------------------------------------------------------------------------------------------------------------------------------------------------------------------------------------------------------------------------------------------------------------------------------------------------------------------------------------------------------------------------------------------------------------------------------------------------------------------------------------------------------------------------------------------------------------------------------------------------------------------------------------------------------------------------------------------------------------------------------------------------------------------------------------------------------------------------------------------------------------------------------------------------------------------------------------------------------------------------------------------------------------------------------------------------------------------------------------------------------------------------------------------------------------------------------------------------------------------------------------------------------------------------------------------------------------------------------------------------------------------------------------------------------------------------------------------------------------------------------------------------------------------------------------------------------------------------------------------------------------------------------------------------------------------------------------------------------------------------------------------------------------------------------------------------------------------------------------------------------------------------------------------------------------------------------------------------------------------------------------------------------------------------------------------------------------------------------------------------------------------------------------------------------------------------------------------------------------------------------------------------------------------------------------------------------------------------------------------------------------------------------------------------------------------------------------------------------------------------------------------------------------------------------------------------------------------------------------------------------------------------------------------------------------------------------------------------------------------------------------------------------------------------------------------------------------------------------------------------------------------------------------------------------------------------------------------------------------------------------------------------------------------------------------------------------------------------------------------------------------------------------------------------------------------------------------------------------------------------------------------------------------------------------------------------------------------------------------------------------------------------------------------------------------------------------------------------------------------------------------------------------------------------------------------------------------------------------------------------------------------------------------------------------------------------------------------------------------------------------------------------------------------------------------------------------------------------------------------------------------------------------------------------------------------------------------------------------------------------------------------------------------------------------------------------------------------------------------------------------------------------------------------------------------------------------------------------------------------------------------------------------------------------------------------------------------------------------------------------------------------------------------------------------------------------------------------------------------------------------------------------------------------------------------------------------------------------------------------------------------------------------------------------------------------------------------------------------------------------------------------------------------------------------------------------------------------------------------------------------------------------------------------------------------------------------------------------------------------------------------------------------------------------------------------------------------------------------------------------------------------------------------------------------------------------------------------------------------------------------------------------------------------------------------------------------------------------------------------------------------------------------------------------------------------------------------------------------------------------------------------------------------------------------------------------------------------------------------------------------------------------------------------------------------------------------------------------------------------------------------------------------------------------------------------------------------------------------------------------------------------------------------------------------------------------------------------------------------------------------------------------------------------------------------------------------------------------------------------------------------------------------------------------------------------------------------------------------------------------------------------------------------------------------------------------------------------------------------------------------------------------------------------------------------------------------------------------------------------------------------------------------------------------------------------------------------------------------------------------------------------------------------------------------------------------------------------------------------------------------------------------------------------------------------------------------------------------------------------------------------------------------------------------------------------------------------------------------------------------------------------------------------------------------------------------------------------------------------------------------------------------------------------------------------------------------------------------------------------------------------------------------------------------------------------------------------------------------------------------------------------------------------------------------------------------------------------------------------------------------------------------------------------------------------------------------------------------------------------------------------------------------------------------------------------------------------------------------------------------------------------------------------------------------------------------------------------------------------------------------------------------------------------------------------------------------------------------------------------------------------------------------------------------------------------------------------------------------------------------------------------------------------------------------------------------------------------------------------------------------------------------------------------------------------------------------------------------------------------------------------------------------------------------------------------------------------------------------------------------------------------------------------------------------------------------------------------------------------------------------------------------------------------------------------------------------------------------------------------------------------------------------------------------------------------------------------------------------------------------------------------------------------------------------------------------------------------------------------------------------------------------------------------------------------------------------------------------------------------------------------------------------------------------------------------------------------------------------------------------------------------------------------------------------------------------------------------------------------------------------------------------------------------------------------------------------------------------------------------------------------------|
| SBA_001721 | Codon optimized<br><i>orgB</i>  | atgttgaaaaatataccgatccatcccctctgtctccggttgaaggtatcctgattaaacgcaagcgttggagcgttacttctcattgagc<br>gcttgaaacaacagcggcactcagcgtgcaaaagccattttgctgagcagagaagaagaacgcaagccctgcgatgatgctgacaggaggg<br>ctacgagcagggcagtgatgacgcactgcaaacaggtggcgcctatttgaccgacaaccagacgagtggttggaaatggatgggaaaaattcaa<br>atctatgcccgtgagttgctcagcggcgtctcgtaccgggaacgttctgacgggtgctggacgagtggttgcgtgattcgtataagccgg<br>aaggtcagctgttttgaccctgcccgtgaaacgcaaaagagatcctcagaactgatggtcgtgattggaatattggccggcactccaa<br>ctcgaatcatcagagcaacgcttttatcatgctcctggcagatcagattgcccaggttttcgcggcaaatatttggtaacggcggctggt<br>gttatcaagcaccatctgagcgcctcaggaactgtcgaccatctcggacaatcgcattaacgcccgtgattgatgattggaagcaaaa<br>cccaagctgaagttattcgtgataa                                                                                                                                                                                                                                                                                                                                                                                                                                                                                                                                                                                                                                                                                                                                                                                                                                                                                                                                                                                                                                                                                                                                                                                                                                                                                                                                                                                                                                                                                                                                                                                                                                                                                                                                                                                                                                                                                                                                                                                                                                                                                                                                                                                                                                                                                                                                                                                                                                                                                                                                                                                                                                                                                                                                                                                                                                                                                                                                                                                                                                                                                                                                                                                                                                                                                                                                                                                                                                                                                                                                                                                                                                                                                                                                                                                                                                                                                                                                                                                                                                                                                                                                                                                                                                                                                                                                                                                                                                                                                                                                                                                                                                                                                                                                                                                                                                                                                                                                                                                                                                                                                                                                                                                                                                                                                                                                                                                                                                                                                                                                                                                                                                                                                                                                                                                                                                                                                                                                                                                                                                                                                                                                                                                                                                                                                                                                                                                                                                                                                                                                                                                                                                                                                                                                                                                                                                                                                                                                                                                                                                                                                                                                                                                                                                                                                                                                                                                                                                                                                                                                                                                                                                                                                                                                                                                                                                                                                                                                                                                                                                                                                                                                                                                                                                                                                                                                                                                                                                                                                                                                                                                                                                                                                                                                                                                                                                                                                                                                                                                                                                                                                                                                                                                                                                                                                                                                                                                                                                                                                                                                                                                                                                                                                                                                                                                                                                                                                                                                                                                                                                                                                                                                                                                                                                                                                                                                                                                                                                                                                                                                                                                                                                                                                                                                                                                                                                                                                                                                                                                                                                                                                                                                                                                                                                                                                                                                                                                                                                                                                                                                                                                                                                                                                                                                                                                                                                                                                                                                                                                                                                                                                                                                                                                                                                                                                                                                                                                                                                                                                                                                                                                                                                                                                                                                                                                                                                                                                                                                                                                                                                                                                                                                                                                                                                                                                                                                                                                                                                                                                                                                                                                                                                                                                                                                                                                                                                                                                                                                                                                                                                                                                                                                                                                                                           |
| SBA_001722 | Codon optimized<br><i>invJ</i>  | atgggtgacgtgagcggcgtgagcagcagcgttaacattctgctccgcagcagcagcaggttggggcctgtccgaaagcgtgaaagaaagg<br>ttgaaaaacacaaacgaaatcacggttgacaagaagatcgtgatattggtgacccctttggttatgcaacaaggaaaccgctgcccgtt<br>gctggcagcttgccgcaacgcccagcggcgaagagcagcaccataacggttaacgtaagcggctgcatcacaacggttaagagcagcgtgct<br>attgctgagaaactgctgaaggtgacggcggagaaagcgttggctgatattagcgtgaaagcaaggtgataaaattgcccggcctgctgcta<br>gcaagaatcgtccgctggaatcgtcagcggcaaaagttgtcccgcatctgaaagcagtgaggtccggtccgaggtcagcgaataaccac<br>cgccattcgagtgacaacataaaagcattgcccgggtaacaataaagccatcggcggtaggggtgctgctaaagaaaggtgcccggcctggcgcg<br>gacgtgctccggcagcactggcggcagcaaacgggcaagccggaggataaaagcacaagaaaggtcaagggcagcttagccagctcccggct<br>aacggactaccatcgccgatctgctcaactgacgggtggcgatgaaagatgcccgtggcagcagctcaaacccatgatgacattttccc<br>aacggcagcggcgttaaaggtgaggacagctctctgacctatctgttccagcgtgggcaacgattactccgctaataccagcagccca<br>ggggggaaatttagcctgatctcagcaatacccaggttgaacatctgtctgacagcaaatggcaaaattggcaatcccaaacgctggcatttga<br>cgctgatgaccagcaaacccgaaacagcaacagcactgctcagcgtccggtagaaggagcagcgttaa                                                                                                                                                                                                                                                                                                                                                                                                                                                                                                                                                                                                                                                                                                                                                                                                                                                                                                                                                                                                                                                                                                                                                                                                                                                                                                                                                                                                                                                                                                                                                                                                                                                                                                                                                                                                                                                                                                                                                                                                                                                                                                                                                                                                                                                                                                                                                                                                                                                                                                                                                                                                                                                                                                                                                                                                                                                                                                                                                                                                                                                                                                                                                                                                                                                                                                                                                                                                                                                                                                                                                                                                                                                                                                                                                                                                                                                                                                                                                                                                                                                                                                                                                                                                                                                                                                                                                                                                                                                                                                                                                                                                                                                                                                                                                                                                                                                                                                                                                                                                                                                                                                                                                                                                                                                                                                                                                                                                                                                                                                                                                                                                                                                                                                                                                                                                                                                                                                                                                                                                                                                                                                                                                                                                                                                                                                                                                                                                                                                                                                                                                                                                                                                                                                                                                                                                                                                                                                                                                                                                                                                                                                                                                                                                                                                                                                                                                                                                                                                                                                                                                                                                                                                                                                                                                                                                                                                                                                                                                                                                                                                                                                                                                                                                                                                                                                                                                                                                                                                                                                                                                                                                                                                                                                                                                                                                                                                                                                                                                                                                                                                                                                                                                                                                                                                                                                                                                                                                                                                                                                                                                                                                                                                                                                                                                                                                                                                                                                                                                                                                                                                                                                                                                                                                                                                                                                                                                                                                                                                                                                                                                                                                                                                                                                                                                                                                                                                                                                                                                                                                                                                                                                                                                                                                                                                                                                                                                                                                                                                                                                                                                                                                                                                                                                                                                                                                                                                                                                                                                                                                                                                                                                                                                                                                                                                                                                                                                                                                                                                                                                                                                                                                                                                                                                                                                                                                                                                                                                                                                                                                                                                                                                                                                                                                                                                                                                                                                                                                                                                                                                                                                                                                                                                                                                                                                                                                                                                                             |
| SBA_001723 | Codon optimized<br><i>spaQ</i>  | atggacgatcctggttttccgcccgaacaaagccctgacttgggtgctgatctctgctccgggtggccagcagattgctcgcaaacattatcggctcgc<br>tggttgctcgttttcaaacctgacgcagctgacaggaacaaaccctggcgtcggatcaactgctggctggtcgtctgtgctcgttttggct<br>gtcctgctggtatggcgaagtctcgtgctcctacggcctcaggtcattctcctgctcctggcgaaggttaa                                                                                                                                                                                                                                                                                                                                                                                                                                                                                                                                                                                                                                                                                                                                                                                                                                                                                                                                                                                                                                                                                                                                                                                                                                                                                                                                                                                                                                                                                                                                                                                                                                                                                                                                                                                                                                                                                                                                                                                                                                                                                                                                                                                                                                                                                                                                                                                                                                                                                                                                                                                                                                                                                                                                                                                                                                                                                                                                                                                                                                                                                                                                                                                                                                                                                                                                                                                                                                                                                                                                                                                                                                                                                                                                                                                                                                                                                                                                                                                                                                                                                                                                                                                                                                                                                                                                                                                                                                                                                                                                                                                                                                                                                                                                                                                                                                                                                                                                                                                                                                                                                                                                                                                                                                                                                                                                                                                                                                                                                                                                                                                                                                                                                                                                                                                                                                                                                                                                                                                                                                                                                                                                                                                                                                                                                                                                                                                                                                                                                                                                                                                                                                                                                                                                                                                                                                                                                                                                                                                                                                                                                                                                                                                                                                                                                                                                                                                                                                                                                                                                                                                                                                                                                                                                                                                                                                                                                                                                                                                                                                                                                                                                                                                                                                                                                                                                                                                                                                                                                                                                                                                                                                                                                                                                                                                                                                                                                                                                                                                                                                                                                                                                                                                                                                                                                                                                                                                                                                                                                                                                                                                                                                                                                                                                                                                                                                                                                                                                                                                                                                                                                                                                                                                                                                                                                                                                                                                                                                                                                                                                                                                                                                                                                                                                                                                                                                                                                                                                                                                                                                                                                                                                                                                                                                                                                                                                                                                                                                                                                                                                                                                                                                                                                                                                                                                                                                                                                                                                                                                                                                                                                                                                                                                                                                                                                                                                                                                                                                                                                                                                                                                                                                                                                                                                                                                                                                                                                                                                                                                                                                                                                                                                                                                                                                                                                                                                                                                                                                                                                                                                                                                                                                                                                                                                                                                                                                                                                                                                                                                                                                                                                                                                                                                                                                                                                                                                                                                                                                                                                                                                                                                                                                                           |
| SBA_001724 | Codon optimized<br><i>invH</i>  | atgaaaaagtctacagttgtctcggcctcttcttttgatagttgcccacaagaccgctaccgctcgtctgtgccaagcgggtccagcaac<br>cgggagcgcagaagaacaactggcctaaccgcaatagcatgatgagtcagagcctccttattgcccacagagccctcctacgctcagcaaacaaatc<br>cttatacaaacataatgcccgaacatcagcgtctaaaaactcggcagatagcagctcgtatttttgtagaatacaaacgcaaacgaaagaaacag<br>gcgctgacctcttccagaaaccccagctatctgctgatgaaaggatgaaagaaagcttaactgagttcaaaaaggtgctcctggaac<br>ctggctccaaaatctgagatctatcagaccctgctgcccacatgaacgcttgacggcctctaa                                                                                                                                                                                                                                                                                                                                                                                                                                                                                                                                                                                                                                                                                                                                                                                                                                                                                                                                                                                                                                                                                                                                                                                                                                                                                                                                                                                                                                                                                                                                                                                                                                                                                                                                                                                                                                                                                                                                                                                                                                                                                                                                                                                                                                                                                                                                                                                                                                                                                                                                                                                                                                                                                                                                                                                                                                                                                                                                                                                                                                                                                                                                                                                                                                                                                                                                                                                                                                                                                                                                                                                                                                                                                                                                                                                                                                                                                                                                                                                                                                                                                                                                                                                                                                                                                                                                                                                                                                                                                                                                                                                                                                                                                                                                                                                                                                                                                                                                                                                                                                                                                                                                                                                                                                                                                                                                                                                                                                                                                                                                                                                                                                                                                                                                                                                                                                                                                                                                                                                                                                                                                                                                                                                                                                                                                                                                                                                                                                                                                                                                                                                                                                                                                                                                                                                                                                                                                                                                                                                                                                                                                                                                                                                                                                                                                                                                                                                                                                                                                                                                                                                                                                                                                                                                                                                                                                                                                                                                                                                                                                                                                                                                                                                                                                                                                                                                                                                                                                                                                                                                                                                                                                                                                                                                                                                                                                                                                                                                                                                                                                                                                                                                                                                                                                                                                                                                                                                                                                                                                                                                                                                                                                                                                                                                                                                                                                                                                                                                                                                                                                                                                                                                                                                                                                                                                                                                                                                                                                                                                                                                                                                                                                                                                                                                                                                                                                                                                                                                                                                                                                                                                                                                                                                                                                                                                                                                                                                                                                                                                                                                                                                                                                                                                                                                                                                                                                                                                                                                                                                                                                                                                                                                                                                                                                                                                                                                                                                                                                                                                                                                                                                                                                                                                                                                                                                                                                                                                                                                                                                                                                                                                                                                                                                                                                                                                                                                                                                                                                                                                                                                                                                                                                                                                                                                                                                                                                                                                                                                                                                                                                                                                                                                                                                                                                                                                                                                                                                                                                                                        |
| SBA_001725 | Codon optimized<br><i>invA</i>  | atgctgctgctcctgctgaaatagcgcgctcctgctcctgagctgctgatctctggttctgatggttatgatcatcagcatgtctgattaccgt<br>tgccgacttattgggtgactctctgatcggctttgaaactgtctctggcaactctggtgtctatggctcctctcagcagcctctctgag<br>ctcagcacccttccggcggctctcgtgatcagcactctgtccgcttggcactgagcactcagcaaacgcccctgatcctgatgaaagcagat<br>gggggtgagatcctcggcactttggtcagtttggtatcggtagcagcctggcgggtgggttctgctgattctccatcagcagcgggtgagtt<br>ttatcgttatacaaaaggcagcgaacgttgccgaggttcggcctcgtctcagcctgacggcgtgcccgggtgcccgggtgcccgggtgcccgg<br>agacctgaaagccggcatttattgatgctgatgacgcccagcggcggcagcgtcctggagcgtgaaagcaaacctgacggtctctcagcggct<br>gcaatgaagtctataaaggctgagctgcttggcggcactatctctcgttaactctcgttggcgttatcagcgtgatgaaagcctcagct<br>gtatggtatgagcagcggcctgagcactcaccactgctgagcagattgggtgatggtctgggtgcccacaaatccggcgttctgctgatcggatttc<br>tgccgctcctcgttaccggctcaacggctgatacagataaacatgggtcgttaaacatctagccagcgtgctgaaataccggtttgctcgtggt<br>gtaacggcattttgacacatcagcactggcagcggcggccttccgctgcccgtttcgttatctgctgtggtgctgctcctgctgtttt<br>actttaaagtccgagggcgaacgttagcgtcgcaaacgcaaaacagcagcagggcagcagcgttgcctcagggagaaaggaaagctagcag<br>cctgggctgattggcggactggataagcttagcaagcgaacccgctcccgtgattttgctggtgcgaaatccgctcgtgaggtatctgga<br>gcgcaactgcccgaacgctctgcccagccaaattcttattgatattggtgctgctcgcagaagtaactgctgctgacgctgagggctggtgat<br>acaactctatcgtcctgctgatataagatcgcgctggaacagttactgctattttgacactgctgagtaactcaacgacagcagcaggt<br>ggtgagctttggcatcaaacaccactcaaccagcaagttccagcagcagcattttgggtgacccatgaggaagggcaaaagctgcccagcgt<br>ggcactgctcgttaagcactggcagcgaactgcaactcgtcggcggtagcgtggcagcaaatggaaggtgatttctgattcacaagaa<br>cgaacacatgctggcaaacgaaagcaagttctctgacctgctgaaaggagttttgcccacccagcagcagcagccttccggaagcgt<br>gcaacgctcgtgctccagcagcgtgagcgtcgtgcaaatgaagctgatacaagcctgcaactgcccctgcccctgcccctgcccctgcccctg<br>aatctggtggagcaccctcgtggtgctgagtcggcttatactgccacaagtctgcaaatgggtggaactcgtgcccgttatggttccggc<br>aagttgaggtgctcattctgtaaaagcattctgcaaacctctggctcccacttttgagctggaccggagagcttcggcaaatctgtaggaact<br>gatcagcgtgaaagcggcagcctgctgattgcccataaggaactgctgctgtagcagcgtgagcgtgctgattatcaagaaaatgatt<br>gaaggtcgtttccggatctggaggtcctgctcctcgtgagattgagatgcaaaagcgtgaatgctcaaaaacatctga                                                                                                                                                                                                                                                                                                                                                                                                                                                                                                                                                                                                                                                                                                                                                                                                                                                                                                                                                                                                                                                                                                                                                                                                                                                                                                                                                                                                                                                                                                                                                                                                                                                                                                                                                                                                                                                                                                                                                                                                                                                                                                                                                                                                                                                                                                                                                                                                                                                                                                                                                                                                                                                                                                                                                                                                                                                                                                                                                                                                                                                                                                                                                                                                                                                                                                                                                                                                                                                                                                                                                                                                                                                                                                                                                                                                                                                                                                                                                                                                                                                                                                                                                                                                                                                                                                                                                                                                                                                                                                                                                                                                                                                                                                                                                                                                                                                                                                                                                                                                                                                                                                                                                                                                                                                                                                                                                                                                                                                                                                                                                                                                                                                                                                                                                                                                                                                                                                                                                                                                                                                                                                                                                                                                                                                                                                                                                                                                                                                                                                                                                                                                                                                                                                                                                                                                                                                                                                                                                                                                                                                                                                                                                                                                                                                                                                                                                                                                                                                                                                                                                                                                                                                                                                                                                                                                                                                                                                                                                                                                                                                                                                                                                                                                                                                                                                                                                                                                                                                                                                                                                                                                                                                                                                                                                                                                                                                                                                                                                                                                                                                                                                                                                                                                                                                                                                                                                                                                                                                                                                                                                                                                                                                                                                                                                                                                                                                                                                                                                                                                                                                                                                                                                                                                                                                                                                                                                                                                                                                                                                                                                                                                                                                                                                                                                                                                                                                                                                                                                                                                                                                                                                                                                                                                                                                                                                                                                                                                                                                                                                                                                                                                                                                                                                                                                                                                                                                                                                                                                                                                                                                                                                                                                                                                                                                                                                                                                                                                                                                                                                                                                                                                                                                                                                                                                                           |
| SBA_001726 | Codon optimized<br><i>invC</i>  | atgaaaaacccacgctcgtgcaatcctggcctcaccgcgaaacacactggccctatcttgaagcagcagcgtgctgattgcaattggtg<br>aatgtgagatccgctcggcgtggccacagaagcaggttggccgctgcccagtggttggttgagcgcgcaacgctaccgctctgagcct<br>gatcggcaatgcccagggcctgagcctgattggtcttgaccgaccggcggctgctgagcggcgggttgggtacaagcgttctggggcga<br>gactggaccggcggcgttaaaactgtagcgtttcaccgggaagtcgcaacgattccggagcagcgtctcagcgtggcaccggcagcgt<br>acgcaagcggctcgtgctgctggcgaacccgctgacacgggttccgcgcaattgatgctcctgacgctggtggtgggccagcgtatgggt<br>ttcgcagcggcgggttggtaagaccactgtagcactgctgtagcagcaaacggaacggcagcgttcttggtaattggtcctgattggcag<br>cgtggtcgtgaaagttaccgaaatgtgagacatgctgctgcaatctcaataagaaagaaaatgctgctgggttttggcagcctcagcactccaa<br>cgtttgaccgctgcaacgctgcccagcgtggcagcagcgtcggcagatatttccgcgacccgggttaaagcgttctcctgattctcagcag<br>gaccgcttatgcaacgctgctgctgagctgctgctggcagcggcagcgtccggctcggcgtggttatccggcgtctggttccgacaatctg<br>ccgcttctgctggagcctccgggtgagcagcagcaggttagcattaccgctcttaccgctcctgctggatcggaagaagaagcggacccga<br>tgccggacagatccgctctcttctggaacgtcaactgtaactgtcccgaacatggccgggtcagggctcatcccccgtctcagctgactgaa<br>gagcgtgagcctgctggttggtaagtgaccacccgactcagcggcagcaagcagcggcgtccgtaagctgacccgcttggaagagcgtg<br>caactgtctatgacctggcggatgctcctggggcagaaacatgacaatgatgctgagcagcaaatgcccgtgagcctggaagcgtggcgt<br>gtcagcctgttggcaacacagcagcctctgatacagctgtccggcatgaacgcttctggcgtcagaaactga                                                                                                                                                                                                                                                                                                                                                                                                                                                                                                                                                                                                                                                                                                                                                                                                                                                                                                                                                                                                                                                                                                                                                                                                                                                                                                                                                                                                                                                                                                                                                                                                                                                                                                                                                                                                                                                                                                                                                                                                                                                                                                                                                                                                                                                                                                                                                                                                                                                                                                                                                                                                                                                                                                                                                                                                                                                                                                                                                                                                                                                                                                                                                                                                                                                                                                                                                                                                                                                                                                                                                                                                                                                                                                                                                                                                                                                                                                                                                                                                                                                                                                                                                                                                                                                                                                                                                                                                                                                                                                                                                                                                                                                                                                                                                                                                                                                                                                                                                                                                                                                                                                                                                                                                                                                                                                                                                                                                                                                                                                                                                                                                                                                                                                                                                                                                                                                                                                                                                                                                                                                                                                                                                                                                                                                                                                                                                                                                                                                                                                                                                                                                                                                                                                                                                                                                                                                                                                                                                                                                                                                                                                                                                                                                                                                                                                                                                                                                                                                                                                                                                                                                                                                                                                                                                                                                                                                                                                                                                                                                                                                                                                                                                                                                                                                                                                                                                                                                                                                                                                                                                                                                                                                                                                                                                                                                                                                                                                                                                                                                                                                                                                                                                                                                                                                                                                                                                                                                                                                                                                                                                                                                                                                                                                                                                                                                                                                                                                                                                                                                                                                                                                                                                                                                                                                                                                                                                                                                                                                                                                                                                                                                                                                                                                                                                                                                                                                                                                                                                                                                                                                                                                                                                                                                                                                                                                                                                                                                                                                                                                                                                                                                                                                                                                                                                                                                                                                                                                                                                                                                                                                                                                                                                                                                                                                                                                                                                                                                                                                                                                                                                                                                                                                                                                                                                                                                                                                                                                                                                                                                                                                                                                                                                                                                                                                                                                                                                                                                                                                                                                                                                                                        |
| SBA_001727 | Codon optimized<br><i>spaOs</i> | atggaacccctggacatccaaacacatgaaagaagaaacaacacgcccgaacccgggaacccctgcccggctctgaaacagcctccggtttaa<br>tggagtgtgactgtaaccgtaagaatgacccctggcggagctggaggcagtggtcagcagcaactgctgctctccgcaacgcaagcagatt<br>gaatggaaaatcaatggcacaacggcctcctgctgggttaattggtgagttggtccagatgaaacatccctgggtgtaaatcaccaggtggctg<br>ctgagagcggcaatgggtgagttga                                                                                                                                                                                                                                                                                                                                                                                                                                                                                                                                                                                                                                                                                                                                                                                                                                                                                                                                                                                                                                                                                                                                                                                                                                                                                                                                                                                                                                                                                                                                                                                                                                                                                                                                                                                                                                                                                                                                                                                                                                                                                                                                                                                                                                                                                                                                                                                                                                                                                                                                                                                                                                                                                                                                                                                                                                                                                                                                                                                                                                                                                                                                                                                                                                                                                                                                                                                                                                                                                                                                                                                                                                                                                                                                                                                                                                                                                                                                                                                                                                                                                                                                                                                                                                                                                                                                                                                                                                                                                                                                                                                                                                                                                                                                                                                                                                                                                                                                                                                                                                                                                                                                                                                                                                                                                                                                                                                                                                                                                                                                                                                                                                                                                                                                                                                                                                                                                                                                                                                                                                                                                                                                                                                                                                                                                                                                                                                                                                                                                                                                                                                                                                                                                                                                                                                                                                                                                                                                                                                                                                                                                                                                                                                                                                                                                                                                                                                                                                                                                                                                                                                                                                                                                                                                                                                                                                                                                                                                                                                                                                                                                                                                                                                                                                                                                                                                                                                                                                                                                                                                                                                                                                                                                                                                                                                                                                                                                                                                                                                                                                                                                                                                                                                                                                                                                                                                                                                                                                                                                                                                                                                                                                                                                                                                                                                                                                                                                                                                                                                                                                                                                                                                                                                                                                                                                                                                                                                                                                                                                                                                                                                                                                                                                                                                                                                                                                                                                                                                                                                                                                                                                                                                                                                                                                                                                                                                                                                                                                                                                                                                                                                                                                                                                                                                                                                                                                                                                                                                                                                                                                                                                                                                                                                                                                                                                                                                                                                                                                                                                                                                                                                                                                                                                                                                                                                                                                                                                                                                                                                                                                                                                                                                                                                                                                                                                                                                                                                                                                                                                                                                                                                                                                                                                                                                                                                                                                                                                                                                                                                                                                                                                                                                                                                                                                                                                                                                                                                                                                                                                                                                                                                                             |
| SBA_001728 | Codon optimized<br><i>spaP</i>  | atgggtaacgataatagcttgattgcaattgctggcgttttccaccctgctgcccgttctcctcagcctgctggtactgctcgtcaaaatcagca<br>ctgcttctgtaggtgcccgaacggcctggtctgcaacaattccaagcaatagccctgaaatggcctgcccagcctgctgctgctgctggtttg<br>tatgtggcggatctacagcagcgtatggtatttccagagatgaaagtggacccttaaacgacatccagcctgagcaaacatgtagtagg<br>ggcctggacggttatccgactaccgatacaagatctccgacgtgagctggtcagttcttgagaaatgcccagtgaaacgtcagtagcaggt<br>aagaaacggaaacggttaaagctgacaagcagagatgaaagccggagcattttgacagctggcgttgcctctcagcctgagcagatataag<br>cgcattcaaaatgggttttacctgacctgcccgtctgctggtgctgattgctccagcgtctgctgcccctgggactgctgtagatgag<br>tcccggcttaccatcagcagcagcctcaaatggtcctgtttggtgcccctggatggttggagcgtgctgctcaaaagcagctgctgcaataca<br>tggactcggcactaa                                                                                                                                                                                                                                                                                                                                                                                                                                                                                                                                                                                                                                                                                                                                                                                                                                                                                                                                                                                                                                                                                                                                                                                                                                                                                                                                                                                                                                                                                                                                                                                                                                                                                                                                                                                                                                                                                                                                                                                                                                                                                                                                                                                                                                                                                                                                                                                                                                                                                                                                                                                                                                                                                                                                                                                                                                                                                                                                                                                                                                                                                                                                                                                                                                                                                                                                                                                                                                                                                                                                                                                                                                                                                                                                                                                                                                                                                                                                                                                                                                                                                                                                                                                                                                                                                                                                                                                                                                                                                                                                                                                                                                                                                                                                                                                                                                                                                                                                                                                                                                                                                                                                                                                                                                                                                                                                                                                                                                                                                                                                                                                                                                                                                                                                                                                                                                                                                                                                                                                                                                                                                                                                                                                                                                                                                                                                                                                                                                                                                                                                                                                                                                                                                                                                                                                                                                                                                                                                                                                                                                                                                                                                                                                                                                                                                                                                                                                                                                                                                                                                                                                                                                                                                                                                                                                                                                                                                                                                                                                                                                                                                                                                                                                                                                                                                                                                                                                                                                                                                                                                                                                                                                                                                                                                                                                                                                                                                                                                                                                                                                                                                                                                                                                                                                                                                                                                                                                                                                                                                                                                                                                                                                                                                                                                                                                                                                                                                                                                                                                                                                                                                                                                                                                                                                                                                                                                                                                                                                                                                                                                                                                                                                                                                                                                                                                                                                                                                                                                                                                                                                                                                                                                                                                                                                                                                                                                                                                                                                                                                                                                                                                                                                                                                                                                                                                                                                                                                                                                                                                                                                                                                                                                                                                                                                                                                                                                                                                                                                                                                                                                                                                                                                                                                                                                                                                                                                                                                                                                                                                                                                                                                                                                                                                                                                                                                                                                                                                                                                                                                                                                                                                                                                                                                                                                                                                                                                                                                                                                                                                                                                                                                                                                                                                                                             |
| SBA_001731 | Codon optimized<br><i>invG</i>  | atgaaaaacgacattctgttggcggcgtgctggcctgcccagctggttggctggcctcaccagcaggttatagctccgagaagatccgggttacgg<br>gcagcggctctgctgcaaaagcagattctctgcccactttctgatgctgagcagcactgcaattgaaagggcgggtgattgctcagcaaatggc<br>ggctcgcaaaaagattaccggcaattctgagttccacagatccaaacgcccgtgctgggaaaactgctccctgcaactgggtctgctcgtgacttt<br>gatggtcagcagctcactacatcagcagcggagcgaatcgttaatggcgttggtagcctggcaactgctcagcctgcaactgcaactgcaactt<br>tgaagcagcggcctgtaacaataaagcaactccctcctgctggtgataatctgtaaaagcaactctctatgcaagcgtccggcgttctgctgta<br>tatggttgaatggcggcaccatgatggaacaacagatgatggcactcagcgtggttggcggcgaacaaatgctgctgctgctgtaagcgtgaa<br>tttggggcagcggcctcacaacctcgtgatcaaaagatggtcattccgggtattgctacggcaatgaaacgctgctgaaagcggaaagaa<br>aacgctgggtaaacttgaagctccagcctcggcctcggcgtcttaagccaaacggcagcagaaaggaagcagaaatccggcgggtgg<br>tatgagcctgcaagaagcgtgaaacagaacggcggcagcagcaaacataatgtggcctatccgcaacccaaacagcctgctggtgaaaggt<br>acggcggagcaggtgcaattcactgagatgctggttaaagcctggagctggcgaacgctcagctgaaatgagcctggaatgaggattggattgga<br>ataagagcagcctggaaagcctgggacagcagctggcggcgtgcaatcaccatccggcagcaagctgggtgtagcctgaaacagcagcagcactc<br>cagcctggacggtagcagccttatttggcggctcaacgctctggagaaaaaagaaacggcagctgtgctgagcgtccggtctgtgctgaccag<br>gagaatgccggcgtatttggacaataactgactcttatacacaactgatcggtagaacgtgctgcaactgagcaactgcaacttggca<br>cctgatcctgctcctggcgtttcagcggcagcggcagatgagatgagcctggacatcgaagatggttaagcaaaaaccccagctgtaga<br>tacgacacccctcgtttagcggctcagagaaggttgactccctgactcagcagattgcaagctgcccagctgcccagctgctgctgattggt<br>ggctacacggcgtgatcaaacggcagcggcgaagcaaacataatgtggcctatccgcaacccaaacagcctgctggtgaaaggt<br>acggcggagcaggtgcaattcactgagatgctggttaaagcctggagctggcgaacgctcagctgaaatgagcctggaatgaggattggattgga<br>ataagagcagcctggaaagcctgggacagcagctggcggcgtgcaatcaccatccggcagcaagctgggtgtagcctgaaacagcagcagcactc<br>cagcctggacggtagcagccttatttggcggctcaacgctctggagaaaaaagaaacggcagctgtgctgagcgtccggtctgtgctgaccag<br>gagaatgccggcgtatttggacaataactgactcttatacacaactgatcggtagaacgtgctgcaactgagcaactgcaacttggca<br>cctgatcctgctcctggcgtttcagcggcagcggcagatgagatgagcctggacatcgaagatggttaagcaaaaaccccagctgtaga<br>tacgacacccctcgtttagcggctcagagaaggttggactccctgactcagcagattgcaagctgcccagctgcccagctgctgctgattggt<br>ggctacacggcgtgatcaaacggcagcggcgaagcaaacataatgtggcctatccgcaacccaaacagcctgctggtgaaaggt<br>acggcggagcaggtgcaattcactgagatgctggttaaagcctggagctggcgaacgctcagctgaaatgagcctggaatgaggattggattgga<br>ataagagcagcctggaaagcctgggacagcagctggcggcgtgcaatcaccatccggcagcaagctgggtgtagcctgaaacagcagcagcactc<br>cagcctggacggtagcagccttatttggcggctcaacgctctggagaaaaaagaaacggcagctgtgctgagcgtccggtctgtgctgaccag<br>gagaatgccggcgtatttggacaataactgactcttatacacaactgatcggtagaacgtgctgcaactgagcaactgcaacttggca<br>cctgatcctgctcctggcgtttcagcggcagcggcagatgagatgagcctggacatcgaagatggttaagcaaaaaccccagctgtaga<br>tacgacacccctcgtttagcggctcagagaaggttggactccctgactcagcagattgcaagctgcccagctgcccagctgctgctgattggt<br>ggctacacggcgtgatcaaacggcagcggcgaagcaaacataatgtggcctatccgcaacccaaacagcctgctggtgaaaggt<br>acggcggagcaggtgcaattcactgagatgctggttaaagcctggagctggcgaacgctcagctgaaatgagcctggaatgaggattggattgga<br>ataagagcagcctggaaagcctgggacagcagctggcggcgtgcaatcaccatccggcagcaagctgggtgtagcctgaaacagcagcagcactc<br>cagcctggacggtagcagccttatttggcggctcaacgctctggagaaaaaagaaacggcagctgtgctgagcgtccggtctgtgctgaccag<br>gagaatgccggcgtatttggacaataactgactcttatacacaactgatcggtagaacgtgctgcaactgagcaactgcaacttggca<br>cctgatcctgctcctggcgtttcagcggcagcggcagatgagatgagcctggacatcgaagatggttaagcaaaaaccccagctgtaga<br>tacgacacccctcgtttagcggctcagagaaggttggactccctgactcagcagattgcaagctgcccagctgcccagctgctgctgattggt<br>ggctacacggcgtgatcaaacggcagcggcgaagcaaacataatgtggcctatccgcaacccaaacagcctgctggtgaaaggt<br>acggcggagcaggtgcaattcactgagatgctggttaaagcctggagctggcgaacgctcagctgaaatgagcctggaatgaggattggattgga<br>ataagagcagcctggaaagcctgggacagcagctggcggcgtgcaatcaccatccggcagcaagctgggtgtagcctgaaacagcagcagcactc<br>cagcctggacggtagcagccttatttggcggctcaacgctctggagaaaaaagaaacggcagctgtgctgagcgtccggtctgtgctgaccag<br>gagaatgccggcgtatttggacaataactgactcttatacacaactgatcggtagaacgtgctgcaactgagcaactgcaacttggca<br>cctgatcctgctcctggcgtttcagcggcagcggcagatgagatgagcctggacatcgaagatggttaagcaaaaaccccagctgtaga<br>tacgacacccctcgtttagcggctcagagaaggttggactccctgactcagcagattgcaagctgcccagctgcccagctgctgctgattggt<br>ggctacacggcgtgatcaaacggcagcggcgaagcaaacataatgtggcctatccgcaacccaaacagcctgctggtgaaaggt<br>acggcggagcaggtgcaattcactgagatgctggttaaagcctggagctggcgaacgctcagctgaaatgagcctggaatgaggattggattgga<br>ataagagcagcctggaaagcctgggacagcagctggcggcgtgcaatcaccatccggcagcaagctgggtgtagcctgaaacagcagcagcactc<br>cagcctggacggtagcagccttatttggcggctcaacgctctggagaaaaaagaaacggcagctgtgctgagcgtccggtctgtgctgaccag<br>gagaatgccggcgtatttggacaataactgactcttatacacaactgatcggtagaacgtgctgcaactgagcaactgcaacttggca<br>cctgatcctgctcctggcgtttcagcggcagcggcagatgagatgagcctggacatcgaagatggttaagcaaaaaccccagctgtaga<br>tacgacacccctcgtttagcggctcagagaaggttggactccctgactcagcagattgcaagctgcccagctgcccagctgctgctgattggt<br>ggctacacggcgtgatcaaacggcagcggcgaagcaaacataatgtggcctatccgcaacccaaacagcctgctggtgaaaggt<br>acggcggagcaggtgcaattcactgagatgctggttaaagcctggagctggcgaacgctcagctgaaatgagcctggaatgaggattggattgga<br>ataagagcagcctggaaagcctgggacagcagctggcggcgtgcaatcaccatccggcagcaagctgggtgtagcctgaaacagcagcagcactc<br>cagcctggacggtagcagccttatttggcggctcaacgctctggagaaaaaagaaacggcagctgtgctgagcgtccggtctgtgctgaccag<br>gagaatgccggcgtatttggacaataactgactcttatacacaactgatcggtagaacgtgctgcaactgagcaactgcaacttggca<br>cctgatcctgctcctggcgtttcagcggcagcggcagatgagatgagcctggacatcgaagatggttaagcaaaaaccccagctgtaga<br>tacgacacccctcgtttagcggctcagagaaggttggactccctgactcagcagattgcaagctgcccagctgcccagctgctgctgattggt<br>ggctacacggcgtgatcaaacggcagcggcgaagcaaacataatgtggcctatccgcaacccaaacagcctgctggtgaaaggt<br>acggcggagcaggtgcaattcactgagatgctggttaaagcctggagctggcgaacgctcagctgaaatgagcctggaatgaggattggattgga<br>ataagagcagcctggaaagcctgggacagcagctggcggcgtgcaatcaccatccggcagcaagctgggtgtagcctgaaacagcagcagcactc<br>cagcctggacggtagcagccttatttggcggctcaacgctctggagaaaaaagaaacggcagctgtgctgagcgtccggtctgtgctgaccag<br>gagaatgccggcgtatttggacaataactgactcttatacacaactgatcggtagaacgtgctgcaactgagcaactgcaacttggca<br>cctgatcctgctcctggcgtttcagcggcagcggcagatgagatgagcctggacatcgaagatggttaagcaaaaaccccagctgtaga<br>tacgacacccctcgtttagcggctcagagaaggttggactccctgactcagcagattgcaagctgcccagctgcccagctgctgctgattggt<br>ggctacacggcgtgatcaaacggcagcggcgaagcaaacataatgtggcctatccgcaacccaaacagcctgctggtgaaaggt<br>acggcggagcaggtgcaattcactgagatgctggttaaagcctggagctggcgaacgctcagctgaaatgagcctggaatgaggattggattgga<br>ataagagcagcctggaaagcctgggacagcagctggcggcgtgcaatcaccatccggcagcaagctgggtgtagcctgaaacagcagcagcactc<br>cagcctggacggtagcagccttatttggcggctcaacgctctggagaaaaaagaaacggcagctgtgctgagcgtccggtctgtgctgaccag<br>gagaatgccggcgtatttggacaataactgactcttatacacaactgatcggtagaacgtgctgcaactgagcaactgcaacttggca<br>cctgatcctgctcctggcgtttcagcggcagcggcagatgagatgagcctggacatcgaagatggttaagcaaaaaccccagctgtaga<br>tacgacacccctcgtttagcggctcagagaaggttggactccctgactcagcagattgcaagctgcccagctgcccagctgctgctgattggt<br>ggctacacggcgtgatcaaacggcagcggcgaagcaaacataatgtggcctatccgcaacccaaacagcctgctggtgaaaggt<br>acggcggagcaggtgcaattcactgagatgctggttaaagcctggagctggcgaacgctcagctgaaatgagcctggaatgaggattggattgga<br>ataagagcagcctggaaagcctgggacagcagctggcggcgtgcaatcaccatccggcagcaagctgggtgtagcctgaaacagcagcagcactc<br>cagcctggacggtagcagccttatttggcggctcaacgctctggagaaaaaagaaacggcagctgtgctgagcgtccggtctgtgctgaccag<br>gagaatgccggcgtatttggacaataactgactcttatacacaactgatcggtagaacgtgctgcaactgagcaactgcaacttggca<br>cctgatcctgctcctggcgtttcagcggcagcggcagatgagatgagcctggacatcgaagatggttaagcaaaaaccccagctgtaga<br>tacgacacccctcgtttagcggctcagagaaggttggactccctgactcagcagattgcaagctgcccagctgcccagctgctgctgattggt<br>ggctacacggcgtgatcaaacggcagcggcgaagcaaacataatgtggcctatccgcaacccaaacagcctgctggtgaaaggt<br>acggcggagcaggtgcaattcactgagatgctggttaaagcctggagctggcgaacgctcagctgaaatgagcctggaatgaggattggattgga<br>ataagagcagcctggaaagcctgggacagcagctggcggcgtgcaatcaccatccggcagcaagctgggtgtagcctgaaacagcagcagcactc<br>cagcctggacggtagcagccttatttggcggctcaacgctctggagaaaaaagaaacggcagctgtgctgagcgtccggtctgtgctgaccag<br>gagaatgccggcgtatttggacaataactgactcttatacacaactgatcggtagaacgtgctgcaactgagcaactgcaacttggca<br>cctgatcctgctcctggcgtttcagcggcagcggcagatgagatgagcctggacatcgaagatggttaagcaaaaaccccagctgtaga<br>tacgacacccctcgtttagcggctcagagaaggttggactccctgactcagcagattgcaagctgcccagctgcccagctgctgctgattggt<br>ggctacacggcgtgatcaaacggcagcggcgaagcaaacataatgtggcctatccgcaacccaaacagcctgctggtgaaaggt<br>acggcggagcaggtgcaattcactgagatgctggttaaagcctggagctggcgaacgctcagctgaaatgagcctggaatgaggattggattgga<br>ataagagcagcctggaaagcctgggacagcagctggcggcgtgcaatcaccatccggcagcaagctgggtgtagcctgaaacagcagcagcactc<br>cagcctggacggtagcagccttatttggcggctcaacgctctggagaaaaaagaaacggcagctgtgctgagcgtccggtctgtgctgaccag<br>gagaatgccggcgtatttggacaataactgactcttatacacaactgatcggtagaacgtgctgcaactgagcaactgcaacttggca<br>cctgatcctgctcctggcgtttcagcggcagcggcagatgagatgagcctggacatcgaagatggttaagcaaaaaccccagctgtaga<br>tacgacacccctcgtttagcggctcagagaaggttggactccctgactcagcagattgcaagctgcccagctgcccagctgctgctgattggt<br>ggctacacggcgtgatcaaacggcagcggcgaagcaaacataatgtggcctatccgcaacccaaacagcctgctggtgaaaggt<br>acggcggagcaggtgcaattcactgagatgctggttaaagcctggagctggcgaacgctcagctgaaatgagcctggaatgaggattggattgga<br>ataagagcagcctggaaagcctgggacagcagctggcggcgtgcaatcaccatccggcagcaagctgggtgtagcctgaaacagcagcagcactc<br>cagcctggacggtagcagccttatttggcggctcaacgctctggagaaaaaagaaacggcagctgtgctgagcgtccggtctgtgctgaccag<br>gagaatgccggcgtatttggacaataactgactcttatacacaactgatcggtagaacgtgctgcaactgagcaactgcaacttggca<br>cctgatcctgctcctggcgtttcagcggcagcggcagatgagatgagcctggacatcgaagatggttaagcaaaaaccccagctgtaga<br>tacgacacccctcgtttagcggctcagagaaggttggactccctgactcagcagattgcaagctgcccagctgcccagctgctgctgattggt<br>ggctacacggcgtgatcaaacggcagcggcgaagcaaacataatgtggcctatccgcaacccaaacagcctgctggtgaaaggt<br>acggcggagcaggtgcaattcactgagatgctggttaaagcctggagctggcgaacgctcagctgaaatgagcctggaatgaggattggattgga<br>ataagagcagcctggaaagcctgggacagcagctggcggcgtgcaatcaccatccggcagcaagctgggtgtagcctgaaacagcagcagcactc<br>cagcctggacggtagcagccttatttggcggctcaacgctctggagaaaaaagaaacggcagctgtgctgagcgtccggtctgtgctgaccag<br>gagaatgccggcgtatttggacaataactgactcttatacacaactgatcggtagaacgtgctgcaactgagcaactgcaacttggca<br>cctgatcctgctcctggcgtttcagcggcagcggcagatgagatgagcctggacatcgaagatggttaagcaaaaaccccagctgtaga<br>tacgacacccctcgtttagcggctcagagaaggttggactccctgactcagcagattgcaagctgcccagctgcccagctgctgctgattggt<br>ggctacacggcgtgatcaaacggcagcggcgaagcaaacataatgtggcctatccgcaacccaaacagcctgctggtgaaaggt<br>acggcggagcaggtgcaattcactgagatgctggttaaagcctggagctggcgaacgctcagctgaaatgagcctggaatgaggattggattgga<br>ataagagcagcctggaaagcctgggacagcagctggcggcgtgcaatcaccatccggcagcaagctgggtgtagcctgaaacagcagcagcactc<br>cagcctggacggtagcagccttatttggcggctcaacgctctggagaaaaaagaaacggcagctgtgctgagcgtccggtctgtgctgaccag<br>gagaatgccggcgtatttggacaataactgactcttatacacaactgatcggtagaacgtgctgcaactgagcaactgcaacttggca<br>cctgatcctgctcctggcgtttcagcggcagcggcagatgagatgagcctggacatcgaagatggttaagcaaaaaccccagctgtaga<br>tacgacacccctcgtttagcggctcagagaaggttggactccctgactcagcagattgcaagctgcccagctgcccagctgctgctgattggt<br>ggctacacggcgtgatcaaacggcagcggcgaagcaaacataatgtggcctatccgcaacccaaacagcctgctggtgaaaggt<br>acggcggagcaggtgcaattcactgagatgctggttaaagcctggagctggcgaacgctcagctgaaatgagcctggaatgaggattggattgga<br>ataagagcagcctggaaagcctgggacagcagctggcggcgtgcaatcaccatccggcagcaagctgggtgtagcctgaaacagcagcagcactc<br>cagcctggacggtagcagccttatttggcggctcaacgctctggagaaaaaagaaacggcagctgtgctgagcgtccggtctgtgctgaccag<br>gagaatgccggcgtatttggacaataactgactcttatacacaactgatcggtagaacgtgctgcaactgagcaactgcaacttggca<br>cctgatcctgctcctggcgtttcagcggcagcggcagatgagatgagcctggacatcgaagatggttaagcaaaaaccccagctgtaga<br>tacgacacccctcgtttagcggctcagagaaggttggactccctgactcagcagattgcaagctgcccagctgcccagctgctgctgattggt<br>ggctacacggcgtgatcaaacggcagcggcgaagcaaacataatgtggcctatccgcaacccaaacagcctgctggtgaaaggt<br>acggcggagcaggtgcaattcactgagatgctggttaaagcctggagctggcgaacgctcagctgaaatgagcctggaatgaggattggattgga<br>ataagagcagcctggaaagcctgggacagcagctggcggcgtgcaatcaccatccggcagcaagctgggtgtagcctgaaacagcagcagcactc<br>cagcctggacggtagcagccttatttggcggctcaacgctctggagaaaaaagaaacggcagctgtgctgagcgtccggtctgtgctgaccag<br>gagaatgccggcgtatttggacaataactgactcttatacacaactgatcggtagaacgtgctgcaactgagcaactgcaacttggca<br>cctgatcctgctcctggcgtttcagcggcagcggcagatgagatgagcctggacatcgaagatggttaagcaaaaaccccagctgtaga<br>tacgacacccctcgtttagcggctcagagaaggttggactccctgactcagcagattgcaagctgcccagctgcccagctgctgctgattggt<br>ggctacacggcgtgatcaaacggcagcggcgaagcaaacataatgtggcctatccgcaacccaaacagcctgctggtgaaaggt<br>acggcggagcaggtgcaattcactgagatgctggttaaagcctggagctggcgaacgctcagctgaaatgagcctggaatgaggattggattgga<br>ataagagcagcctggaaagcctgggacagcagctggcggcgtgcaatcaccatccggcagcaagctgggtgtagcctgaaacagcagcagcactc<br>cagcctggacggtagcagccttatttggcggctcaacgctctggagaaaaaagaaacggcagctgtgctgagcgtccggtctgtgctgaccag<br>gagaatgccggcgtatttggacaataactgactcttatacacaactgatcggtagaacgtgctgcaactgagcaactgcaacttggca<br>cctgatcctgctcctggcgtttcagcggcagcggcagatgagatgagcctggacatcgaagatggttaagcaaaaaccccagctgtaga<br>tacgacacccctcgtttagcggctcagagaaggttggactccctgactcagcagattgcaagctgcccagctgcccagctgctgctgattggt<br>ggctacacggcgtgatcaaacggcagcggcgaagcaaacataatgtggcctatccgcaacccaaacagcctgctggtgaaaggt<br>acggcggagcaggtgcaattcactgagatgctggttaaagcctggagctggcgaacgctcagctgaaatgagcctggaatgaggattggattgga<br>ataagagcagcctggaaagcctgggacagcagctggcggcgtgcaatcaccatccggcagcaagctgggtgtagcctgaaacagcagcagcactc<br>cagcctggacggtagcagccttatttggcggctcaacgctctggagaaaaaagaaacggcagctgtgctgagcgtccggtctgtgctgaccag<br>gagaatgccggcgtatttggacaataactgactcttatacacaactgatcggtagaacgtgctgcaactgagcaactgcaacttggca<br>cctgatcctgctcctggcgtttcagcggcagcggcagatgagatgagcctggacatcgaagatggttaagcaaaaaccccagctgtaga<br>tacgacacccctcgtttagcggctcagagaaggttggactccctgactcagcagattgcaagctgcccagctgcccagctgctgctgattggt<br>ggctacacggcgtgatcaaacggcagcggcgaagcaaacataatgtggcctatccgcaacccaaacagcctgctggtgaaaggt<br>acggcggagcaggtgcaattcactgagatgctggttaaagcctggagctggcgaacgctcagctgaaatgagcctggaatgaggattggattgga<br>ataagagcagcctggaaagcctgggacagcagctggcggcgtgcaatcaccatccggcagcaagctgggtgtagcctgaaacagcagcagcactc<br>cagcctggacggtagcagccttatttggcggctcaacgctctggagaaaaaagaaacggcagctgtgctgagcgtccggtctgtgctgaccag<br>gagaatgccggcgtatttggacaataactgactcttatacacaactgatcggtagaacgtgctgcaactgagcaactgcaacttggca<br>cctgatcctgctcctggcgtttcagcggcagcggcagatgagatgagcctggacatcgaagatggttaagcaaaaaccccagctgtaga<br>tacgacacccctcgtttagcggctcagagaaggttggactccctgactcagcagattgcaagctgcccagctgcccagctgctgctgattggt<br>ggctacacggcgtgatcaaacggcagcggcgaagcaaacataatgtggcctatccgcaacccaaacagcctgctggtgaaaggt<br>acggcggagcaggtgcaattcactgagatgctggttaaagcctggagctggcgaacgctcagctgaaatgagcctggaatgaggattggattgga<br>ataagagcagcctggaaagcctgggacagcagctggcggcgtgcaatcaccatccggcagcaagctgggtgtag |



|            |          |                                                                                                                                                                                                                                                                                                                                                                                                                                                                                                                                                                                                                                                                                                                                                                                                                                                                                                                                                                                                                                                                                                                                                                                                                                                                                                                                                                                                                                                                                                                                                                                                                                                                                                                                                                                                                                                                                                                                                                                                                                                                                                                                                                                                                                                                                                                                                                                                                                                                                                                                                                                                                                                                                                                                                                                                                                                                                                                 |
|------------|----------|-----------------------------------------------------------------------------------------------------------------------------------------------------------------------------------------------------------------------------------------------------------------------------------------------------------------------------------------------------------------------------------------------------------------------------------------------------------------------------------------------------------------------------------------------------------------------------------------------------------------------------------------------------------------------------------------------------------------------------------------------------------------------------------------------------------------------------------------------------------------------------------------------------------------------------------------------------------------------------------------------------------------------------------------------------------------------------------------------------------------------------------------------------------------------------------------------------------------------------------------------------------------------------------------------------------------------------------------------------------------------------------------------------------------------------------------------------------------------------------------------------------------------------------------------------------------------------------------------------------------------------------------------------------------------------------------------------------------------------------------------------------------------------------------------------------------------------------------------------------------------------------------------------------------------------------------------------------------------------------------------------------------------------------------------------------------------------------------------------------------------------------------------------------------------------------------------------------------------------------------------------------------------------------------------------------------------------------------------------------------------------------------------------------------------------------------------------------------------------------------------------------------------------------------------------------------------------------------------------------------------------------------------------------------------------------------------------------------------------------------------------------------------------------------------------------------------------------------------------------------------------------------------------------------|
| SBa_001746 | T7*(T3)  | <p>atgaacacgattaacatcgcctaagaacgactctctgacatcgaactggctgctatcccgttcaaacactctggctgaccattacggtagcgtt<br/> tagctcgcgaacagttggcccttgagcatgagctctacgagatgggtgaagcacgcttccgcaagatggttgagcgtcaactaaaagctggtga<br/> ggtttgcggataacgctgccgccaagcctctcatcaactaccctactcctcaagatgatgtgcacgcacacacgactggtttgaggaagtgaagct<br/> aagcgcggcaagcggccgacagcctccagttcctgcaagaatcaagccggaagcctgagcgtacatcaccattaagaccactctggcttgcc<br/> taaccagtgctgacaatacaaacggtcaggtctgtagcaagcgcaatcggctgggccaattgaggacgaggtcgtctcggctgatccgtgaact<br/> tgaagctaaagcacttcaagaaaaacttgaggaaacactcaacaagcgcgtaggcagcgtctacaagaaaagcatttatgcaagttgtcgaggt<br/> gacatgctctcaaggtctactcggtagcagggcgtggtctctcgtggcataaaggaagactctatcattgagagtagcgtgacatcgagatgc<br/> tcattgagtagcaaccggaatggttagcttacaccgcaaaaactgctggcgtagtaggtcaagactctgagactatcgaactcgacacgaaacacg<br/> tgaggtatcgcacccgtagcaggtgagctggctggcatctcctcagatgttccaactctgctagttctcctcaagcgtggaactgacattact<br/> ggtggtggctatgggctaaccgctcgtcctctcctggcgtggtgctactcacagtagaagaagcactgagcgtacgaaagcgtttacatgc<br/> ctgaggtgtacaagcgatataacattgcgcaaaacccgcatggaaaatcaacaagaaagtctgagcgtcgccaactaatcacaagttgga<br/> gcattgtccggtcgaggacatccctgcatgagcgtgaagaactcccgatgaaacgggaagacatcgacatgaactctgaggtctcaccgctg<br/> tggaaacgtgctgcccgtcgtgtgtagcgcgaagcaaggtcgcgaagtctcgcgtatcagccttgagttcatgcttgagcaagccaataagt<br/> ttgctaaccataagccatctgggttcccttacaacatggaactggcggcgtgctgtttacgctgtgtcaatgttcaaccgcaaggtaacgat<br/> gaccaaaagactgcttacgctggcgaaggttaaaccaactcggtaaggaaggttactactggctgaaaaatccacggtgcaaacctgctggggtg<br/> gacaaggttccgttccctgagcgcacaaagttcatgaggaaaacccagagaacatcatggcttgcgctaagtctccactggagaacacttgg<br/> ggctgagcaagattctccgtctcgtctccctgctgctctgctttgagtagcctggggtacagcaccacggcctgagctataactgctccctcc<br/> ctggcgtttgagcgggtctgctctggcactcagcactctcctcgcgtagctccgagatgagtaggtggtcgcgctggttaactgcttccatg<br/> gaaacggttcaggacatctacgggatgttgcataagaaagtcaacgagattctacaagcagacgcaatcaatgggacggataaacgaagtagt<br/> cogtgaacgtagagaacactggtgaaaatctctgagaagtagcaagctgggcaactaagcactggctggtcaatggctggcttacgggttactcg<br/> cagtgtagtaaacggtcagtcagtcagcgtggcttaccgggtccaaagagttcggcttccgtcaacaagtgtggaagataccattcagccagct<br/> atgattccgcaaggtctgatgttcaactcagccgaatcaggtcgtggatatacagcctaaagctgatttgggaaatctgtgagcgtgacggtg<br/> tagctcgggttgaagcaatgaactggcttaagctcctgctcgaagctgctggctgctgaggtcaagataaagaagactggagagatctctcgaa<br/> cgcttgcgctgtgcaattgggtaactcctgatggtttccctgctgtggcaggaatacaagaagcctattcagaagcgtcctggaactgatttctctg<br/> ggtcaatttccgttgcacactcacttaacccaacaagaatagcagagattgtagcacaacaacagaggtctggtatcgcctcaacttggtagc<br/> acagccaagacggtagccactctgtaagactgtagtggggcaacagagaagtaggaatcgaatctttgctgatctacgactcctctcg<br/> tacgattccggtgacgctgcaaacctgttcaaacgtagtggcgaacataggttgacacatagagctctgtgatgactggctgattctac<br/> gaccagttccgtgaccagttgcaagagttcaattggacaataatgcccagcactccgggttaaaagtaactgaaacctccgtgacatcttagag<br/> cggactcgcggtcgcgtaa</p> |
| SBa_001747 | T7*(K1F) | <p>atgaacacgattaacatcgcctaagaacgactctctgacatcgaactggctgctatcccgttcaaacactctggctgaccattacggtagcgtt<br/> tagctcgcgaacagttggcccttgagcatgagctctacgagatgggtgaagcacgcttccgcaagatggttgagcgtcaactaaaagctggtga<br/> ggtttgcggataacgctgccgccaagcctctcatcaactaccctactcctcaagatgatgtgcacgcacacacgactggtttgaggaagtgaagct<br/> aagcgcggcaagcggccgacagcctccagttcctgcaagaatcaagccggaagcctgagcgtacatcaccattaagaccactctggcttgcc<br/> taaccagtgctgacaatacaaacggtcaggtctgtagcaagcgcaatcggctgggccaattgaggacgaggtcgtctcggctgatccgtgaact<br/> tgaagctaaagcacttcaagaaaaacttgaggaaacactcaacaagcgcgtaggcagcgtctacaagaaaagcatttatgcaagttgtcgaggt<br/> gacatgctctcaaggtctactcggtagcagggcgtggtctctcgtggcataaaggaagactctatcattgagagtagcgtgacatcgagatgc<br/> tcattgagtagcaaccggaatggttagcttacaccgcaaaaactgctggcgtagtaggtcaagactctgagactatcgaactcgacacgaaacacg<br/> tgaggtatcgcacccgtagcaggtgagctggctggcatctcctcagatgttccaactctgctagttctcctcaagcgtggaactgacattact<br/> ggtggtggctatgggctaaccgctcgtcctctcctggcgtggtgctactcacagtagaagaagcactgagcgtacgaaagcgtttacatgc<br/> ctgaggtgtacaagcgatataacattgcgcaaaacccgcatggaaaatcaacaagaaagtctgagcgtcgccaactaatcacaagttgga<br/> gcattgtccggtcgaggacatccctgcatgagcgtgaagaactcccgatgaaacgggaagacatcgacatgaactctgaggtctcaccgctg<br/> tggaaacgtgctgcccgtcgtgtgtagcgcgaagcaaggtcgcgaagtctcgcgtatcagccttgagttcatgcttgagcaagccaataagt<br/> ttgctaaccataagccatctgggttcccttacaacatggaactggcggcgtgctgtttacgctgtgtcaatgttcaaccgcaaggtaacgat<br/> gaccaaaagactgcttacgctggcgaaggttaaaccaactcggtaaggaaggttactactggctgaaaaatccacggtgcaaacctgctggggtg<br/> gacaaggttccgttccctgagcgcacaaagttcatgaggaaaacccagagaacatcatggcttgcgctaagtctccactggagaacacttgg<br/> ggctgagcaagattctccgtctcgtctccctgctgctctgctttgagtagcctggggtacagcaccacggcctgagctataactgctccctcc<br/> ctggcgtttgagcgggtctgctctggcactcagcactctcctcgcgtagctccgagatgagtaggtggtcgcgctggttaactgcttccatg<br/> gaaacggttcaggacatctacgggatgttgcataagaaagtcaacgagattctacaagcagacgcaatcaatgggacggataaacgaagtagt<br/> cogtgaacgtagagaacactggtgaaaatctctgagaagtagcaagctgggcaactaagcactggctggtcaatggctggcttacgggttactcg<br/> cagtgtagtaaacggtcagtcagtcagcgtggcttaccgggtccaaagagttcggcttccgtcaacaagtgtggaagataccattcagccagct<br/> atgattccgcaaggtctgatgttcaactcagccgaatcaggtcgtggatatacagcctaaagctgatttgggaaatctgtgagcgtgacggtg<br/> tagctcgggttgaagcaatgaactggcttaagctcctgctcgaagctgctggctgctgaggtcaagataaagaagactggagagatctctcgaa<br/> cgcttgcgctgtgcaattgggtaactcctgatggtttccctgctgtggcaggaatacaagaagcctattcagacgcgctgaaacctgatgttctc<br/> ggtcgttcaacctccagccagcctcaacccaacaagaatagcagagattgtagcacaacaacagaggtctggtatcgcctcaacttctgtac<br/> acagccaagacggtagccactctgtaagactgtagtggggcaacagagaagtaggaatcgaatctttgctgatctacgactcctctcg<br/> tacgattccggtgacgctgcaaacctgttcaaacgtagtggcgaacataggttgacacatagagctctgtgatgactggctgattctac<br/> gaccagttccgtgaccagttgcaagagttcaattggacaataatgcccagcactccgggttaaaagtaactgaaacctccgtgacatcttagag<br/> cggactcgcggtcgcgtaa</p>    |

a. Underlined sequences are restriction sites that are a legacy of the initial design.

## Supplementary Note 1: Supplementary data used to refactor SPI-1

### 1.A. Gene order and RBS selection

RBS sequences were selected for each gene to approximately match the ratios of protein that are expressed in the T3SS needle structure. This was gleaned using various sources of information and datasets containing protein numbers became available over the course of the project as well as new tools for RBS design and characterization. One source of information was the molar ratios between components, which had been published (Supplementary Figure 2a)<sup>1,2</sup>. In addition, we cloned the native RBS for each gene and measured their strengths using a fluorescent reporter (Supplementary Figure 2b and 20). This was done by cloning the 30bp region upstream of the ATG for the *prg-org* operon or -150 to +150 regions from the *inv-spa* operon into a plasmid containing a constitutive promoter and mRFP reporter and fluorescence was measured using flow cytometry (Methods). The expression levels were then approximately mimicked using synthetic RBSs and we decided to implement a minimum RBS strength for genes that we had evidence were expressed at low levels. When the *prg-org* operon was originally built the weakest RBS was relatively strong, but this yielded a functional refactored operon. To expand the number of expression levels we could set, a small RBS library was built and characterized in *Salmonella* prior to refactoring *inv-spa*. This was done by mutagenizing the BBa\_B0030 RBS (Methods). *InvH* and *spaOs* were included at a later stage and the RBS Calculator was used to design their sequences (see Notes 1.D. and 1.E). The order of genes with the operons was also decided based on these data, with the most highly expressed genes appearing upstream.

### 1.B. The refactored *prg-org* operon in a p15a backbone under T7\*(T3) RNAP control

The first refactored *prg-org* operon was designed and tested in the context of a low copy pSC101 plasmid under the control of the IPTG-inducible  $P_{tac}$  promoter and  $lacI^q$  on the same plasmid (pMR\_prgorgR1: *prg-org*<sup>R1</sup>; Figure 2a, and Supplementary Figure 3a). We moved *prg-org* to a p15a backbone so that pSC101 could be used for *inv-spa* engineering (see next Notes). In addition, a controller was introduced to separate the regulation so that the IPTG-inducible system is carried on a separate plasmid and an attenuated version of T7 RNAP that has been engineered to only induce T3 RNAP promoters ( $P_{tac-O2}$  driven T7\*(T3): pMR\_controller1) is used to induce *prg-org*<sup>3</sup>. This requires replacing the  $P_{tac}$  promoter with a T3 RNAP promoter of appropriate strength. The initial construct contained the  $P_{T3}$  promoter, obtained from previous work<sup>3</sup>. This yielded secretion, but even in the absence of inducer (however, when the controller was not present there was no secretion) (Supplementary Figure 3c). We then tested a series of promoters of different strength and found that one ( $P_{T3.1}$ ) that enabled inducible secretion from the controller plasmid (Supplementary Figure 3d).

### 1.C. Library of chimeric native/refactored *inv-spa* operons

The first refactored *inv-spa* operon was synthesized and found to be non-functional. To determine which gene caused the loss of function, a series of operons were built that exchanged the RBS and codon sequence of each native gene with the synthetic RBS and sequence on the pMR\_nativeinvspa plasmid, which encodes native *inv-spa* operon under  $P_{BAD}$  promoter control (Supplementary Figure 4). The chimeric plasmid was tested in the  $\Delta invF$ -*spaS* strain (MR02). This demonstrated that function could be recovered when the native *spaO* sequence was included. Initially, we tried new genes synthesized with different codon usages, but this did not abrogate the problem. Finally, we built additional chimeras to look for internal sequences that needed to be retained (Note 1.D).

### 1.D. Identification and redesign of *spaOs*

Within the native *spaO* gene, the region spanning 456 to 610 nucleotides was found to be essential (Figure 2f). Possible alternative start codons were identified within this region, including codons that had been reported to serve as alternative start sites in prokaryotes<sup>7,8</sup>. In each case, we mutated the third nucleotide in the codon to disrupt the potential start site, but retain the amino acid encoded (Tables S4). This was done using the  $\Delta invF$ -*spaS* knockout strain (MR02) containing the native *inv-spa* operon complemented on a plasmid (pMR\_nativeinvspa). The ability to secrete the reporter was assayed for each of these mutations (Supplementary Figure 5). The result showed that *gtg* at 609 is the alternative start codon for tandem translation of *spaO* gene (Figure 2h and 2i).

Since it was identified that both full length SpaO and smaller peptide SpaOs are necessary for secretion (Figure 2 and S5), *spaOs* was individually codon optimized and introduced into the refactored *inv-spa* operon. To control the expression level, a series of RBSs of different strength were designed by the RBS Calculator online tool version (<https://salis.psu.edu/software>) using the RBS Calculator Design mode version 1.1, with organism option as *Salmonella enterica* subsp. *enterica* serovar Typhimurium str. LT2 (ACCTCCTTA) (Supplementary Table 5) (Methods)<sup>9</sup>. The location of *spaOs* was chosen to be between *invC* and *spaP* in the refactored operon in order to separate the gene from *spaO* yet separate from the highly expressed genes. The new *inv-spa* plasmids with the different RBSs were assayed for secretion in a  $\Delta invF$ -*spaS* strain (MR02). Several strong RBSs were shown to recover secretion and we selected the strongest RBS (SBa\_001710) from them.

### 1.E. Inclusion of *invH* in the refactored *inv-spa* operon

The function of InvH is to help localize the outer membrane ring component protein InvG<sup>10</sup>. Initially, we did not include the gene in the refactored *inv-spa* operon because it was previously shown to be non-essential<sup>11</sup> and it is encoded outside of the *inv-spa* operon in SPI-1. The gene was also found to be non-essential in our hands and it was not included in the first operons as a result. However, it was reported that the formation of needle complexes and invasion into epithelial cells were significantly reduced for *invH*-deficient *Salmonella*<sup>11,12</sup>. Therefore, we tested a codon-optimized version of *invH* to test for improved secretion. A series of RBSs for *invH* was designed by RBS Design mode version 1.1, with the organism set as *Salmonella enterica* subsp. *enterica* serovar Typhimurium str. LT2 (ACCTCCTTA) (Methods)<sup>9</sup>. This was tested in the context of the refactored *inv-spa* operon containing the *spaOs* gene. This refactored operon with *invH* was designated as *inv-spa*<sup>R2</sup>.

### 1.F. Placement of the refactored *inv-spa* operon under T7\*(K1F) RNAP control

The refactored *inv-spa* operon was initially tested using the arabinose-inducible P<sub>BAD</sub> control where AraC is expressed from the same plasmid (previous Notes and Figures 2d-j). We wanted to select a RNAP that is orthogonal to T7\*(T3) RNAP, used to control *prg-org*, so that the two operons could be induced independently. We had noticed that when the refactored *inv-spa* operon is highly induced, this can lead to cell leakage as detected by GroEL (not shown). Therefore, we decided to use the T7\*(K1F) RNAP, which is orthogonal to T7\*(T3) RNAP and weaker<sup>3</sup>. A controller was constructed where T7\*(K1F) RNAP is under the control of the AHL-inducible P<sub>lux</sub> system (Supplementary Figure 8b). The P<sub>BAD</sub> promoter and inducible system were replaced with the P<sub>K1F</sub> promoter in plasmid, pMR\_invspaR3 (*inv-spa*<sup>R3</sup>). This yielded a system where secretion could be induced in a  $\Delta invH$ -*spaS* knockout (MR21) (Supplementary Figure 8).

### 1.G. Analysis of the refactored *prg-org inv-spa* operons in $\Delta prgH-orgC\Delta invH-spaS$

As an intermediate step, we analyzed the ability of the two refactored operons to complement secretion in a double knockout. This knockout retains the portions of SPI-1 external to these operons (Figure 1a). The two RNAPs were combined to build a single controller plasmid (pMR\_controller3) where IPTG induces T7\*(T3) RNAP and AHL induces T7\*(K1F) RNAP (Supplementary Figure 17c and Methods). This controller was transformed with the plasmids containing refactored *prg-org* (pMR\_prgorgR3: *prg-org*<sup>R3</sup>) and *inv-spa* (pMR\_invspaR3: *inv-spa*<sup>R3</sup>) and tested for secretion in a  $\Delta prgH-orgC\Delta invH-spaS$  knockout (MR04; Figure 2b). Structure analysis by electron microscopy (EM) requires a non-flagellated strain of *Salmonella*. Therefore, we introduced an additional mutation into the  $\Delta prgH-orgC\Delta invH-spaS$  strain in order to disrupt the production of flagella  $\Delta flhDC$  (MR06). Structures were isolated from the double knockout strain and characterized by EM (Figure 2b, right panel). Although all substructures were identified from refactored system, needle filament was distinctively short compared to native system.

Therefore, it was necessary to increase the expression of PrgI, a component for needle filament. To this end, ribozyme, RiboJ was added at the 5'-UTR of *prgI* gene in refactored operon, which also showed increased expression of PrgI/PrgJ (*prg-org*<sup>R4</sup>; Figure 2c, Supplementary Figure 9b). The bacterial surface was analyzed obtained from the  $\Delta flhDC\Delta prgH-orgC\Delta invH-spaS$  strain containing refactored *prg-org* operon tuned with RiboJ (*prg-org*<sup>R4</sup>) together with refactored *inv-spa* operon (*inv-spa*<sup>R3</sup>) (Supplementary Figure 9a). The needles were then purified, negative stained, and identified using EM (Supplementary Figure 9b). The refactored system produces needle complexes that are comparable in topology with the native operon and are consistent with functional T3SSs observed in previous work.

### 1.H. Search for SPI-1 regions outside of *prgH-orgC* and *invH-iacP* required for secretion

The two refactored *prg-org*<sup>R4</sup>*inv-spa*<sup>R3</sup> operons were able to complement activity in a double operon knockout (Figure 3b), but not when the complete SPI-1 was deleted. Prior to identifying *invR*, we hypothesized that there was a region in the deleted portion that was required for secretion. The possibilities included regulatory proteins (SprB, HilA, HilC, and HilD) and the *iagB* and *iacP* genes, as well as many effectors and chaperones (Supplementary Figure 10a). We made several deletion strains that also knocked out the region between *prgH* and *spaS* in addition to the two operons ( $\Delta prgH-orgC\Delta invH-sipC$ ;  $\Delta prgH-orgC\Delta invH-iacP$ ;  $\Delta invH-orgC$ ; Supplementary Figure 10a). This showed that the loss in secretion was due to the elimination of this region (Supplementary Figure 10b). This result indicates that the loss of activity is due to a factor in the genomic region between *sicP* and *hilD* (*sicP*, *sptP*, *iagB*, *hilA* and *hilD* including intergenic region between genes). Because both *sicP* and *sptP* are expressed from the reporter plasmid, this narrows the possibilities to *iagB*, *hilA*, and *hilD* together with intergenic region. However, the addition of *iagB* was unable to rescue the function of refactored system in  $\Delta SPI-1$  strain (Supplementary Figure 10c).

### 1.I. Deletion of *invF* and *invE* from the final refactored system

The *invF* and *invE* genes were known to be nonessential, but were included in the early versions of the refactored operons. This is because we wanted to maintain the regulatory feedback provided by InvF (for regulator/chaperone expression) and InvE had been shown to increase secretion of early substrates<sup>13,14</sup>. After building a functional refactored system, we tested for additional genes that could be deleted in the  $\Delta SPI-1$  background and these were found to be non-essential.

## Supplementary Methods

### *Characterization of Salmonella enterica serovar Typhimurium LT2 DW01*

Laboratory *S. typhimurium* was used as the wild type strain throughout the study. Genotyping was performed by PCR analysis and sequencing of representative genes, including, *hisG*, *rpoS*, *rpsL*, and *xylR*. The full genome was also sequenced. Genomic DNA was isolated using gDNA purification kit (Promega, #A1125). Genome sequencing was performed on a Pacific Biosciences RS instrument (Broad Institute Genomics Platform). A total of 97,485 filtered subreads (441 Mb) were generated using 6 SMRT cells. BLASR software (Pacific Biosciences) was used for reference-guided assembly against LT2 (GenBank assembly GCA\_000006945.1) and separately against SL1344 (GenBank Assembly GCF\_000210855.2). Variant calling was then performed using Quiver (Pacific Biosystems). In sum, 236 variants were identified in the assembly based on LT2, and 2,715 variants were identified in the assembly based on SL1344. Based on the reduced variability indicates a closer evolutionary relationship, we focused on the LT2-based assembly. The genetic mutations are listed in Supplementary Table 1 in comparison with LT2. To reflect the different genotype, the strain is demarcated as DW01.

### *RNA-seq analysis*

Strand specific RNA-seq was performed to determine the expression of the needle component proteins for the refactored and WT systems. Strains containing either system were cultured in IM (Methods) and the refactored system was induced with 10  $\mu$ M IPTG and 10  $\mu$ M AHL. Total RNA was isolated from each strain after 2 hrs of induction using PureLink RNA mini kit (Life Technologies #12183018A). Purified RNA samples were submitted for deep sequencing at MIT BioMicro Center (Cambridge, MA). Strand specific RNA-seq libraries were created by the BioMicro Center facility. The quality of RNA samples were assessed by fragment analyzer and nanodrop analysis then rRNA was removed by Ribozero kits (Bacteria; Illumina). After cDNA was synthesized by Illumina Truseq kits adding dUTP on second strand, the libraries were constructed by SPRIworks (Beckman Coulter) including amplification and barcoding. A reference genome was assembled by combining the laboratory wild type genomic sequence (Note 1.A.) with plasmids sequences. Reads were trimmed of barcodes and aligned to reference genome using BWA 0.7.10<sup>15</sup>. Strand-specific RPKM values were calculated using custom scripts which used the Bamtools API<sup>16</sup>. Read depth profiles were computed using the “mpileup -d 20000” function from the SAMtools suite<sup>17</sup>. For both computations, counts were added together from the replicates. Experimental error in RPKM errors was calculated using values obtained from biological replicates of strains.

### *Protein expression analysis of needle complex proteins*

The needle complex protein expression levels were analyzed by western blot analysis from the refactored SPI-1 (MR30) in IM with 10  $\mu$ M of IPTG and AHL. After 6 hrs, the bacterial cultures were harvested by centrifugation at 5,000 rpm for 15 mins. Each cell pellet was resuspended and a western blot was performed (Methods) using an anti-needle complex antibody as the primary antibody. For the comparison, we used non-flagellated *Salmonella typhimurium* SB905 carrying the plasmid pSB1418, which expresses transcriptional regulator *hilA* under the control of the P<sub>BAD</sub> promoter. The purified needle complex from this strain at 6 hrs was used to show the expression levels (Supplementary Figure 13)<sup>1</sup>. The *HilA* overexpressed strain was used for the comparison because the WT strain had much lower levels of needle complex proteins expressed, making it hard to resolve their ratios (not shown).

### *The refactored SPI-1 in different strain backgrounds*

The refactored system was transferred into additional *Salmonella* strains and tested for activity. Two strains were tested: *S. typhimurium* strain SL1344 (generous gift from Dr. Denise M. Monack, Professor of Stanford School of Medicine) and LT2 from ATCC (ATCC®700720™). First, ΔSPI-1 mutants were constructed for each strain by P22 phage transduction. Next, the reporter plasmid (pMR\_reporter), the final plasmid-borne refactored version of SPI-1 (pMR\_prgorgR5: *prg-org*<sup>R5</sup> and pMR\_invspaR4: *inv-spa*<sup>R4</sup>), and controller plasmid (pMR\_controller3) were sequentially introduced by electroporation.

### Supplementary References

1. Marlovits, T. C. *et al.* Structural Insights into the Assembly of the Type III Secretion Needle Complex. *Science* **306**, 1040–1042 (2004).
2. Schraidt, O. & Marlovits, T. C. Three-dimensional model of Salmonella's needle complex at subnanometer resolution. *Science* **331**, 1192–1195 (2011).
3. Temme, K., Hill, R., Segall-Shapiro, T. H., Moser, F. & Voigt, C. A. Modular control of multiple pathways using engineered orthogonal T7 polymerases. *Nucleic Acids Res.* **40**, 8773–8781 (2012).
4. Kubori, T., Sukhan, A., Aizawa, S. I. & Galán, J. E. Molecular characterization and assembly of the needle complex of the Salmonella typhimurium type III protein secretion system. *Proc. Natl. Acad. Sci. U. S. A.* **97**, 10225–10230 (2000).
5. Widmaier, D. M. *et al.* Engineering the Salmonella type III secretion system to export spider silk monomers. *Mol. Syst. Biol.* **5**, 309 (2009).
6. Datsenko, K. A. & Wanner, B. L. One-step inactivation of chromosomal genes in Escherichia coli K-12 using PCR products. *Proc. Natl. Acad. Sci.* **97**, 6640–6645 (2000).
7. Ansong, C. *et al.* Experimental annotation of post-translational features and translated coding regions in the pathogen Salmonella Typhimurium. *BMC Genomics* **12**, 433 (2011).
8. Blattner, F. R. *et al.* The Complete Genome Sequence of Escherichia coli K-12. *Science* **277**, 1453–1462 (1997).
9. Salis, H. M. The ribosome binding site calculator. *Methods Enzymol.* **498**, 19–42 (2011).



10. Crago, A. M. & Koronakis, V. Salmonella InvG forms a ring-like multimer that requires the InvH lipoprotein for outer membrane localization. *Mol. Microbiol.* **30**, 47–56 (1998).
11. Altmeyer, R. M. *et al.* Cloning and molecular characterization of a gene involved in Salmonella adherence and invasion of cultured epithelial cells. *Mol. Microbiol.* **7**, 89–98 (1993).
12. Sukhan, A., Kubori, T., Wilson, J. & Galán, J. E. Genetic Analysis of Assembly of the Salmonella enterica Serovar Typhimurium Type III Secretion-Associated Needle Complex. *J. Bacteriol.* **183**, 1159–1167 (2001).
13. Eichelberg, K. & Galán, J. E. Differential regulation of Salmonella typhimurium type III secreted proteins by pathogenicity island 1 (SPI-1)-encoded transcriptional activators InvF and hilA. *Infect. Immun.* **67**, 4099–4105 (1999).
14. Kubori, T. & Galán, J. E. Salmonella type III secretion-associated protein InvE controls translocation of effector proteins into host cells. *J. Bacteriol.* **184**, 4699–4708 (2002).
15. Li, H. & Durbin, R. Fast and accurate short read alignment with Burrows-Wheeler transform. *Bioinforma. Oxf. Engl.* **25**, 1754–1760 (2009).
16. Barnett, D. W., Garrison, E. K., Quinlan, A. R., Strömberg, M. P. & Marth, G. T. BamTools: a C++ API and toolkit for analyzing and managing BAM files. *Bioinforma. Oxf. Engl.* **27**, 1691–1692 (2011).
17. Li, H. *et al.* The Sequence Alignment/Map format and SAMtools. *Bioinforma. Oxf. Engl.* **25**, 2078–2079 (2009).
